# Supplementary material for: Development and Analysis of Soil Water Infiltration Global Database
Source: Copernicus journal article supplement (doi:10.5194/essd-2018-11), 2018-03-06
Supplement: Supplementary file [file essd-2018-11-AC2-supplement.zip]

## Authors' Response to the Review Comments

**Journal:** Earth Syst. Sci. Data Discuss  
**Manuscript #:** Earth Syst. Sci. Data Discuss., <https://doi.org/10.5194/essd-2018-11>  
**Title of Paper:** Development and Analysis of Soil Water Infiltration Global Database  
**Authors:** Mehdi Rahmati et al.

We thank the reviewer (Prof. Dr. Marnik Vanclooster) for his valuable comments to improve this manuscript. As far as possible the comments have been addressed in the revised version of the manuscript. Please see the attached zip file to find the Revised Manuscript-Tracked and Revised-Manuscript-Cleaned PDF files in it. Following are the replies for specific comments.

### Comment:

The paper describes the construction of the Soil Water Infiltration Global Database (SWIG). Based on a detailed literature research, as well the provision of data of the many co-authors of the manuscript, an infiltration experiment database is constructed that tends towards a global coverage. In total 5023 infiltration curves are compiled. In addition to the basic information related to the infiltration experiments, additional ancillary information is provided allowing to explain the infiltration. This allows constructing explanatory and predictive infiltration models. Part of the infiltration experiments is analyzed using physical based infiltration models (1D and 3 D analytical infiltration equations). Finally, the authors discuss the strengths and the weaknesses of the database and the possible applications of the data in hydrological and environmental studies.

The presented work is novel, as no similar database of experimental infiltration curves exists with the ambition of a global coverage. This database may, therefore, play a key role in improving the parametrization of the infiltration process in global Earth System Models (ESM). This improvement is of major importance, as infiltration is a basic process controlling hydrological fluxes in earth systems but yet poorly represented. The database has, therefore, the potential to improve the parameterization of soil hydrological fluxes and to reduce the uncertainties associated with current soil hydraulic pedotransfer functions. The paper has, therefore, the potential to become a valuable contribution to ESSD. However, some concerns can be formulated that should be considered in a revision before the paper can be accepted as a full publication in ESSD. The major concerns can be formulated as follows:

### Response:

Authors thank Prof. Dr. Marnik Vanclooster for his positive feedback on this work. We understand the reviewers concerns about the presentation of the collected data and then we did our best to address nearly all of his concerns in manuscript.

### Comment:

1. The paper deals with infiltration, but a clear definition of infiltration is lacking. The authors generally refer in their manuscript to the infiltration that will be observed in controlled field experiments, without being explicit on this. Yet, infiltration is a more general hydrological process that occurs also in transient natural and uncontrolled conditions. Hence many statements referring to the controlled infiltration experiment will not hold for the uncontrolled natural infiltration process. This adds confusion in many

statements in the paper (e.g. infiltration generally decreases in time: :), that should be corrected by clearly defining the type of infiltration that is considered in the analysis.

**Response:**

The authors thank the reviewer for this accurate comment. The revised paper was modified accordingly to implement more details about water infiltration at the scale of the water cycle and water infiltration as monitored on the field. Please refer to lines 199-216 and 223-227.

**Lines 199-216:** *Two main mechanisms are responsible for the generation of excess water that produce overland flow: Dunne saturation excess and Hortonian infiltration excess (Sahoo et al., 2008). Dunne overland flow or saturation excess occurs when the soil profile is completely saturated and precipitation can no longer infiltrate into soil. The Dunne mechanism is more common to near-channel areas or it is generated from partial areas of the hillslope where water tables are shallowest (Sahoo et al., 2008). On the other hand, Hortonian overland flow is characterized by rainfall intensities exceeding the infiltration rate of the soil. In the other words, during a rainfall event, water infiltration at the soil surface and runoff are highly conditioned by the boundary condition, namely, under field condition, of the rainfall intensity and the soil hydraulic properties. If the rainfall intensity is lower than the soil infiltrability, water will completely infiltrate into the soil without any runoff (Hillel, 2013). In this case, the infiltration rate will align with the rainfall intensity. Otherwise, if the precipitation intensity exceeds the soil infiltration rate at a certain moment in time, excess water will be generated even if the soil profile is unsaturated. In this case water will pond on the soil surface and becomes available for surface runoff. In this case, the boundary condition at soil surface shifts from imposed flow rate to imposed water pressure head. Admitting that the water pressure heads remain constant at the soil surface, the infiltration rate describes a decreasing function over time and tending towards the value of the hydraulic conductivity corresponding to the water pressure head at the surface (Angulo et al., 2016, Chow et al., 1988). In the past decades, water infiltration tests, using either ponded or tension infiltrometers have been developed to quantify the cumulative infiltration at the soil surface. In this case, the 3D axisymmetric water infiltration corresponds to an upper boundary defined by a constant water pressure head or a series of constant water pressure heads.*

**Lines 223-227:** *As stated above, the infiltration rate  $i(t)$  is expected to strongly decrease down to a plateau defined by the value of the hydraulic conductivity corresponding to the imposed water pressure head plus a term related to radial water infiltration (Angulo et al., 2016). In the case of large rings, the final infiltration rate approaches the value of the hydraulic conductivity corresponding to the imposed water pressure head (gravity flow). Consequently, if water ponding is imposed at surface,  $i(t)$  tends towards the saturated hydraulic conductivity.*

**Comment:**

2. The authors should more correctly define the extension scale of the database. The SWIG has the ambition to be global, but yet data were compiled from “only” 54 countries all over the world. It is not guaranteed that global soil variability is represented when collecting data from “only” 54 countries. The fact that all textural classes are nearly represented in the database does not warrant representativeness. It would be better to evaluate other soil properties (e.g. major soil type according to FAO or WRB soil reference system), to demonstrate and claim global representativeness. The map in Figure 1 clearly shows that

major regions of the world are not represented, which may considerably limit the global scope of the database or the application of data from the database in global Earth System Models. It may be suggested that the authors perform a representative analysis, in which not only “countries” or “available texture class” are considered as a criterion for representativeness, but other criteria such as “WRB or FAO soil type”, “earth climate region”, “earth ecozone region”.

#### Response:

The data that are provided is the best that can be done at present to make available infiltration data with the largest possible coverage. As these data are spread over all continents it is a fair to state that SWIG aims at providing global coverage of infiltration data. Of course it is possible to remap the coordinates of the infiltration experiments onto other spatial attributes eventually pointing out gaps in covering soil orders or climatic zones. But this does not question the usefulness of the database provided. We are also not claiming that we can cover global soil variability and thus provide a full picture of global variability in soil infiltration properties. As said, this is the best that can be done at present and we are aiming/hoping to collect more data in future to release the second version of SWIG that will contain more data from remaining countries. We also analyzed the number of infiltration curves available for the different Köppen–Geiger Climate Classes (Rubel et al., 2017; Kottek et al., 2006) and WRB and USDA soil taxonomy systems derived from SoilGrids (Hengl et al., 2017). Please refer to lines 333 to 341 and figure 3 to 5.

**Lines 333-341:** Fig. 3 shows the number of samples by climatic zones (Rubel et al., 2017; Kottek et al., 2006). Majority of the data is from warm temperate, fully humid climate (49%), arid steppe climate and warm temperate climate with dry summer are the second and third most represented climate classes with 22 and 12 % respectively. On the other hand, Fig. 4 and 5 show the frequency of experimental sites respectively by WRB and USDA soil taxonomy systems based on the SoilGrids dataset (Hengl et al., 2017). Regarding the WRB classification system (Fig. 4), in total, 35 WRB reference soil subgroups are included among experimental sites where 55% of the experimental sites comprised four subgroup classes of Haplic Acrisols (8%), Haplic Luvisols (11%), Haplic Calcisols (15%), and Haplic Cambisols (21%). While 29 soil suborders classes of USDA soil taxonomy are included in this study (Fig. 5) where Udalfs (9%), Orthents (9%), and Ustolls (9%) are the most frequently appeared soil suborders in this investigation.

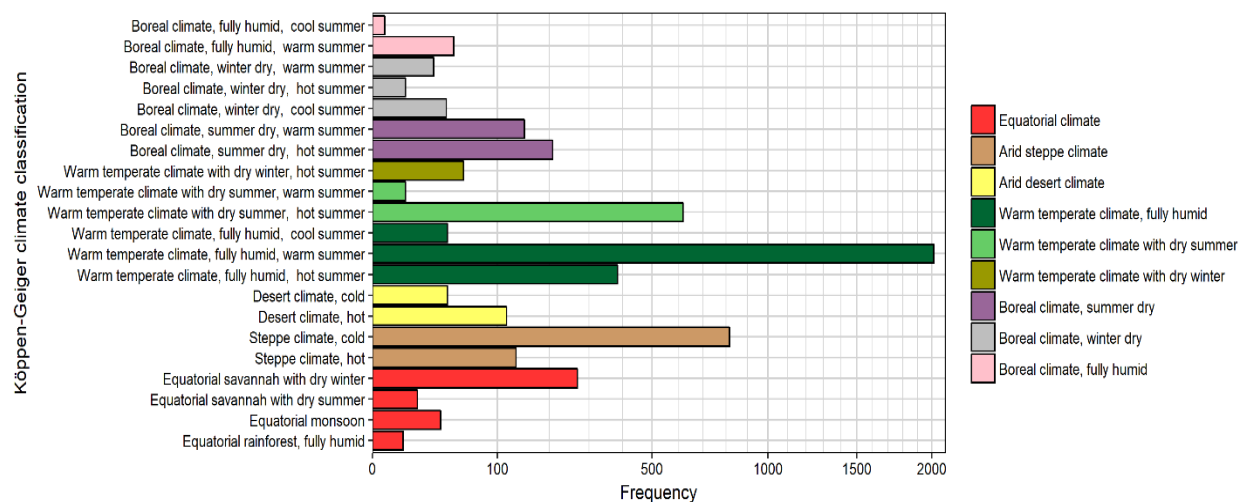



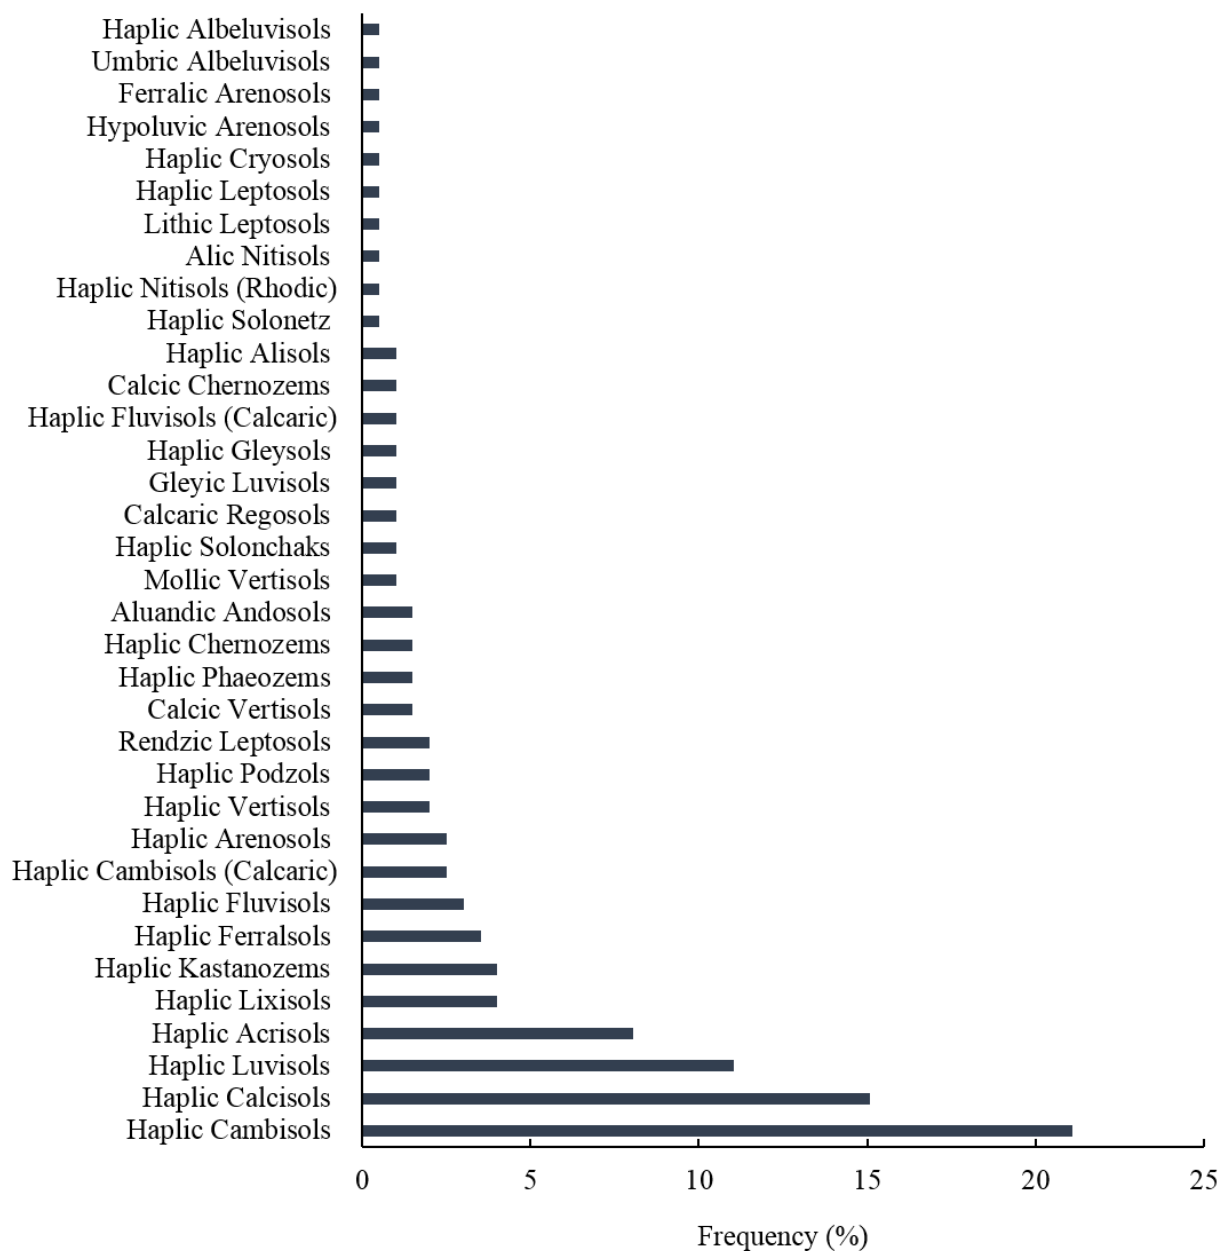

Figure 4- Frequency of WRB reference soil subgroups in experimental sites derived from SoilGrids (Hengl et al., 2017)

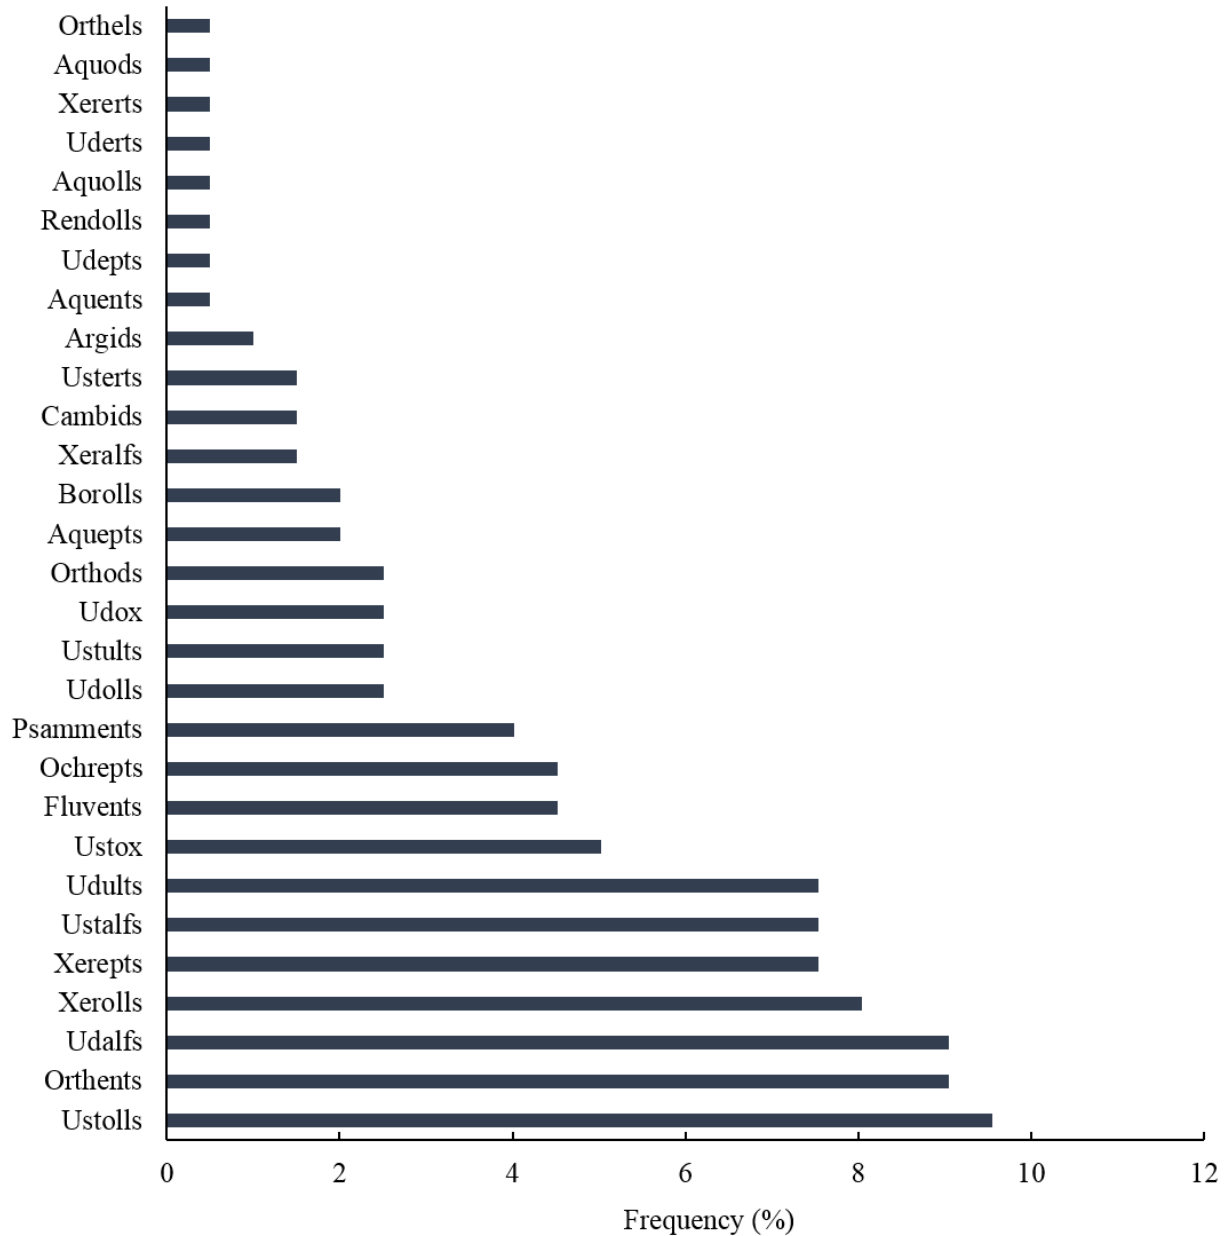

Figure 5- Frequency of USDA soil suborders in experimental sites (Hengl et al., 2017)

**Comment:**

3. A set of ancillary variables are introduced in the data set. The intention of this is to apply data mining techniques to explain the infiltration process parameters and hence to allow developing new explanatory or predictive models. However, the quality of these models will depend on the quality of the ancillary variables that have been introduced in the database. Unfortunately, some ancillary variables are proposed in Table 4 that are not well defined or not well normalized or standardized. The added value of adding these ancillary variables to the database should be reconsidered. This is particularly the case for FC (many definitions of the field water capacity can be retrieved in the literature, see e.g. Nachabe,

1998), soil pH (measured in water or in KCl), and wet aggregate stability.

**Response:**

Thank you to highlight this important concern. Providing detailed information on each soil properties is beyond the scope of the present manuscript. However, we have supplied the reference for all data (if available) that people can check the methodologies if needed. In case of those soil properties which we used for the presented analysis we simply assumed that measurement methodology did not significantly influenced the assumptions. For further use of the dataset harmonization will be indispensable e.g. generation of pedotransfer functions. In lines 288-290 and 496-506 we highlight it for the readers.

Some variables were detailed because they are frequently part of the soil descriptive indicators (as pH, FC) concerning other scientific communities (i.e., geochemistry, agriculture). We preferred to keep these, in case SWIG database would interest sciences from other areas of expertise. Note that for PCA, statistical analyses we use only variables expected to play a role on a physical ground.

**Lines 288-290:** *The references and correspondences for data supplied by direct communications with researchers are also reported in Table 2. Therefore, users may refer to these references for detailed information about the applied methods or procedures.*

**Lines 496-506:** *With respect to the transcription error, a strong effort has been made to double check data transcription to prevent or at least to minimize any probable error of this nature. Values of soil properties such as textural composition are known to vary strongly between different laboratories labs and measurement methods. This is especially true for the finer textural classes like clay. Unfortunately, information on the measurement used to determine soil properties is most of the time lacking or insufficient to assess the magnitude of errors or biases. Internationally, there are typically more than one standard method to measure soil properties and several methods may have been applied to measure the reported soil characteristics. In this regard, no conversion has been made and only raw data are reported in database. However, we have supplied the reference for all data (if available) that people can check the methodologies if needed. Although supplying such information for each soil property may facilitate the use of database, but it will need a lot of additional work that could not be performed at this stage of development of the database. Such a work could be the purpose of a second version of the database that any reader should feel free to undertake to do.*

**Comment:**

4. A very limited and preliminary data exploration analysis by means of PCA is presented in section 3.6. The preliminary and limited scope of this analysis questions the overall results of this analysis. For instance, the sorptivity,  $S$ , has been integrated into the PCA analysis. Yet  $S$  is not an intrinsic time-invariant soil property, but a soil variable that strongly is affected by the initial and saturated water content. Mixing such time dynamic state variable with static properties (such as soil texture,  $K_s$ , : : :) in a PCA has little sense, as the results will strongly depend on the initial water content before the infiltration will start.

**Response:**

The authors thank the reviewer for these precisions. Sorptivity,  $S$ , and hydraulic conductivity,  $K_s$

were analyzed since they are two parameters that define water infiltration, considering the studied equations used for modelling water infiltration (e.g., equations 6-7). We agree with the reviewer that, in opposite to  $K_{sat}$ ,  $S$  is not an intrinsic permeable for the soil.  $S$  depends upon the soil hydraulic function and initial and final water contents. In this study, we decided to include  $S$  in the PCA for completeness and not with the aim of seeking correlations. Interestingly it shows a small but positive correlation with  $K_{sat}$  with deserve further attention as these are two quantities to be estimated from infiltration data.

**Comment:**

Line 170. "In addition to its global coverage". Cf. above. Global coverage should be demonstrated by a representatively analysis.

**Response:**

The sentence was slightly changed to avoid an over globalization of the data.

**Comment:**

Line 176. We should expect that land use can be assessed for all the cases. If the spatial coordinates of the infiltration data are known, land use can be retrieved from historical land use data archives (see Google Earth Engine).

**Response:**

Yes, the reviewer is right. However, this is out of the scope of this activity. It is also questionable whether the retrieved land use will correspond to the actual land use of a point scale measurement given the discrepancies in spatial scales. We have reported the land use when it was available but adding data without on-site verification is not a correct way to proceed. This is what we can consider in a next generation of SWIG when we will have more time to evaluate the accuracy of the reported land uses and perform on-site verifications.

**Comment:**

Line 199. "In general, the soil infiltration rate decreases nonlinearly over time". Cf above. This is specifically the case when the infiltration process is studied under controlled conditions (typically as the cases where controlled infiltration experiments are performed). In general, infiltration is very time dynamic, conditioned to time variable climatic conditions, and in-situ infiltration rates will not 'in general' decrease with time. It is therefore suggested to give a clear definition of "infiltration" in this paper and make a clear distinction between in-situ and controlled experimental infiltration processes.

**Response:**

The manuscript was revised accordingly, including several sentences to introduce in more details the concept of water infiltration and its measure on the field. Please refer to lines 199-216.

**Lines 199-216:** *Two main mechanisms are responsible for the generation of excess water that produce overland flow: Dunne saturation excess and Hortonian infiltration excess (Sahoo et al., 2008). Dunne overland flow or saturation excess occurs when the soil profile is completely saturated and precipitation can no longer infiltrate into soil. The Dunne mechanism is more common to near-channel areas or it is generated from partial areas of the hillslope where water*



tables are shallowest (Sahoo et al., 2008). On the other hand, Hortonian overland flow is characterized by rainfall intensities exceeding the infiltration rate of the soil. In the other words, during a rainfall event, water infiltration at the soil surface and runoff are highly conditioned by the boundary condition, namely, under field condition, of the rainfall intensity and the soil hydraulic properties. If the rainfall intensity is lower than the soil infiltration rate, water will completely infiltrate into the soil without any runoff (Hillel, 2013). In this case, the infiltration rate will align with the rainfall intensity. Otherwise, if the precipitation intensity exceeds the soil infiltration rate at a certain moment in time, excess water will be generated even if the soil profile is unsaturated. In this case water will pond on the soil surface and becomes available for surface runoff. In this case, the boundary condition at soil surface shifts from imposed flow rate to imposed water pressure head. Admitting that the water pressure heads remain constant at the soil surface, the infiltration rate describes a decreasing function over time and tending towards the value of the hydraulic conductivity corresponding to the water pressure head at the surface (Angulo et al., 2016, Chow et al., 1988). In the past decades, water infiltration tests, using either ponded or tension infiltrometers have been developed to quantify the cumulative infiltration at the soil surface. In this case, the 3D axisymmetric water infiltration corresponds to an upper boundary defined by a constant water pressure head or a series of constant water pressure heads.

**Comment:**

Line 207. “However, as infiltration proceeds, the gradient: : :.” This is only the case when a pressure head boundary condition is used to define the infiltration process. This may not be the case when flux boundary conditions are used (e.g. constant precipitation). For instance, in case infiltration in a dry soil is analyzed subjected to constant flux boundary conditions, with an imposed flux that is smaller than the saturated hydraulic conductivity of the soil, than no ponding will occur, all water will infiltrate, and no decrease of pressure gradients will be observed.

**Response:**

See comment above.

**Comment:**

Line 209. “: : :approximates saturated hydraulic conductivity”. This definition is often debated in the literature. For instance, Kutilek and Nielsen (1994), suggest  $K_s = 2/3 * \text{the asymptotic value}$ .

**Response:**

When water infiltration experiments are performed, under constant water pressure head at surface, 1D infiltration rate decreases from infinity to the final infiltration rate that corresponds to gravity flow, i.e. the value of the hydraulic conductivity at the imposed water pressure head. Would it be zero, the infiltration rate will tend towards the value of the saturated hydraulic conductivity (see for instance Haverkamp et al., 1994). For some soils (in particular fine soils with very low permeability), steady state is unreachable within reasonable times. For these cases, two term equations (Vandervaere et al., 2000) can be used to describe cumulative infiltration and infiltration rate. In such a case, the final slope can be linear functions of  $K_s$ , for which Kutilek and Nielsen proposed  $2/3$ .

**Comment:**

Line 218. The Richards equation written in water content form is often referred to as the Fokker-Planck water diffusion equation.

**Response:**

Done

**Comment:**

Line 245. “.. from all over the globe”. Be more rigorous. Many parts of the globe have not been considered for data collection.

**Response:**

Done

**Comment:**

Line 278. To avoid confusion, define  $M_i$  exactly.

**Response:**

The variable was change to  $D$ , for particle diameter. Indeed, as stated in the revised version,  $D_i$  corresponds to the geometric average of interval limits that define three main fractions of sand, silt, and clay with mean values of 0.001, 0.026, and 1.025 mm, respectively.

**Comment:**

Line 302. Please reformulate this phrase (what is the principle phrase?).

**Response:**

Done

**Comment:**

Line 327. This statement is clearly not supported by the data in Figure 4. Please avoid general statements that are not supported by the data, or introduce cautionary notes to put such statements in a correct perspective.

**Response:**

The previous figures 3 and 4 were removed in the revised manuscript. We changed the sentence. Land use is known to impact soil structure and thus water infiltration processes. We then change the sentence to turn it into a general statement and add a reference.

**Comment:**

Line 363. Correct: “Matlab™”.

**Response:**

Done

**Comment:**

Line 372. The “material and methods” section does not explain in detail the difference between those two approaches. What is exactly meant by ‘measured  $K_{sat}$ ’?

**Response:**

The measured values of  $K_{sat}$  were obtained by other means by the contributors and tabulated in SWIG database. The comparison of the orders of magnitude of the values obtained by fitting water infiltration data, referred to as estimated  $K_s$  with the values tabulated in SWIG database (referred to as measured one) and the previous studies for the different classes of soil helps to validate the estimated values. This is already described in lines 424-426.

**Lines 424-426:** *The measured values of  $K_{sat}$  were obtained by other means by the contributors and tabulated in SWIG database. Refer to reference for collected data for detailed information of applied means to measure  $K_{sat}$ .*

**Comment:**

Line 888. If Table 3 is the continuation of Table 2, then it should not be a new table. (So no increase in table number).

**Response:**

Table 3 was turned into Table 2.

**Comment:**

Line 911. For improving the comparability, please harmonized the data in the same units (eg. log values in cm/day).

**Response:**

It is true that for the comparability harmonization would give a much clearer view, but full dataset were not available to derive mean values uniformly in  $\log_{10}$  cm/day

**Comment:**

Line 918. Figure 3 adds very little information to the manuscript and is not very useful for the reader. Please consider to eliminate.

**Response:**

Done
