# Supplementary material for: Development and Analysis of Soil Water Infiltration Global Database
Source: Copernicus journal article supplement (doi:10.5194/essd-2018-11), 2018-03-06
Supplement: Supplementary file [file essd-2018-11-AC2-supplement.zip]

## 1 Development and Analysis of Soil Water Infiltration Global Database

2 Mehdi Rahmati<sup>1,2,\*</sup>, Lutz Weihermüller<sup>2,3</sup>, Jan Vanderborght<sup>2,3</sup>, Yakov A. Pachepsky<sup>4</sup>, Lili Mao<sup>5</sup>,  
3 Seyed Hamidreza Sadeghi<sup>6</sup>, Niloofar Moosavi<sup>2</sup>, Hossein Kheirfam<sup>7</sup>, Carsten Montzka<sup>2,3</sup>, Kris Van  
4 Looy<sup>2,3</sup>, Brigitta Toth<sup>8</sup>, Zeinab Hazbavi<sup>6</sup>, Wafa Al Yamani<sup>9</sup>, Ammar A. Albalasmeh<sup>10</sup>, Ma'in Z.  
5 Alghzawi<sup>10</sup>, Rafael Angulo-Jaramillo<sup>11</sup>, Antônio Celso Dantas Antonino<sup>12</sup>, George Arampatzis<sup>13</sup>,  
6 Robson André Armindo<sup>14</sup>, Hossein Asadi<sup>15</sup>, Yazidhi Bamutaze<sup>16</sup>, Jordi Batlle-Aguilar<sup>17,18,19</sup>,  
7 Béatrice Béchet<sup>20</sup>, Fabian Becker<sup>21</sup>, Günter Blöschl<sup>22,23</sup>, Klaus Böhne<sup>24</sup>, Isabelle Braud<sup>25</sup>, Clara  
8 Castellano<sup>26</sup>, Artemi Cerdà<sup>27</sup>, Maha Chalhoub<sup>17</sup>, Rogerio Cichota<sup>28</sup>, Milena Císlerová<sup>29</sup>, Brent  
9 Clothier<sup>30</sup>, Yves Coquet<sup>17,31</sup>, Wim Cornelis<sup>32</sup>, Corrado Corradini<sup>33</sup>, Artur Paiva Coutinho<sup>12</sup>, Muriel  
10 Bastista de Oliveira<sup>34</sup>, José Ronaldo de Macedo<sup>35</sup>, Matheus Fonseca Durães<sup>14</sup>, Hojat Emami<sup>36</sup>, Iraj  
11 Eskandari<sup>37</sup>, Asghar Farajnia<sup>38</sup>, Alessia Flammini<sup>33</sup>, Nándor Fodor<sup>39</sup>, Mamoun Gharaibeh<sup>10</sup>,  
12 Mohamad Hossein Ghavimipani<sup>6</sup>, Teamrat A. Ghezzehei<sup>40</sup>, Simone Giertz<sup>41</sup>, Evangelos G.  
13 Hatzigiannakis<sup>13</sup>, Rainer Horn<sup>42</sup>, Juan José Jiménez<sup>43</sup>, Diederik Jacques<sup>44</sup>, Saskia Deborah  
14 Keesstra<sup>45,46</sup>, Hamid Kelishadi<sup>47</sup>, Mahboobeh Kiani-Harchegani<sup>6</sup>, Mehdi Kouselou<sup>1</sup>, Madan  
15 Kumar Jha<sup>48</sup>, Laurent Lassabatere<sup>11</sup>, Xiaoyan Li<sup>49</sup>, Mark A. Liebig<sup>50</sup>, Lubomír Lichner<sup>51</sup>, María  
16 Victoria López<sup>52</sup>, Deepesh Machiwal<sup>53</sup>, Dirk Mallants<sup>54</sup>, Micael Stolben Mallmann<sup>55</sup>, Jean Dalmo  
17 de Oliveira Marques<sup>56</sup>, Miles R Marshall<sup>57</sup>, Jan Mertens<sup>58</sup>, Félicien Meunier<sup>59</sup>, Mohammad  
18 Hossein Mohammadi<sup>15</sup>, Binayak P Mohanty<sup>60</sup>, Mansonia Pulido-Pulido-Moncada<sup>61</sup>, Suzana  
19 Montenegro<sup>62</sup>, Renato Morbidelli<sup>33</sup>, David Moret-Fernández<sup>52</sup>, Ali Akbar Moosavi<sup>63</sup>, Mohammad  
20 Reza Mosaddeghi<sup>47</sup>, Seyed Bahman Mousavi<sup>1</sup>, Hasan Mozaffari<sup>63</sup>, Kamal Nabiollahi<sup>64</sup>,  
21 Mohammad Reza Neyshabouri<sup>65</sup>, Marta Vasconcelos Ottoni<sup>66</sup>, Theophilo Benedicto Ottoni  
22 Filho<sup>67</sup>, Mohammad Reza Pahlavan Rad<sup>68</sup>, Andreas Panagopoulos<sup>13</sup>, Stephan Peth<sup>69</sup>, Pierre-  
23 Emmanuel Peyneau<sup>20</sup>, Tommaso Picciafuoco<sup>22,33</sup>, Jean Poesen<sup>70</sup>, Manuel Pulido<sup>71</sup>, Dalvan José  
24 Reinert<sup>72</sup>, Sabine Reinsch<sup>57</sup>, Meisam Rezaei<sup>32,93</sup>, Francis Parry Roberts<sup>57</sup>, David Robinson<sup>57</sup>, Jesús  
25 Rodrigo-Comino<sup>73,74</sup>, Otto Corrêa Rotunno Filho<sup>75</sup>, Tadaomi Saito<sup>76</sup>, Hideki Suganuma<sup>77</sup>, Carla  
26 Saltalippi<sup>33</sup>, Renáta Sándor<sup>39</sup>, Brigitta Schütt<sup>21</sup>, Manuel Seeger<sup>74</sup>, Nasrollah Sepehrnia<sup>78</sup>, Ehsan  
27 Sharifi Moghaddam<sup>6</sup>, Manoj Shukla<sup>79</sup>, Shiraki Shutaro<sup>80</sup>, Ricardo Sorando<sup>25</sup>, Ajayi Asishana  
28 Stanley<sup>81</sup>, Peter Strauss<sup>82</sup>, Zhongbo Su<sup>83</sup>, Ruhollah Taghizadeh-Mehrjardi<sup>84</sup>, Encarnación  
29 Taguas<sup>85</sup>, Wenceslau Geraldes Teixeira<sup>86</sup>, Ali Reza Vaezi<sup>87</sup>, Mehdi Vafakhah<sup>6</sup>, Tomas Vogel<sup>29</sup>,  
30 Iris Vogeler<sup>28</sup>, Jana Votrubova<sup>29</sup>, Steffen Werner<sup>88</sup>, Thierry Winarski<sup>11</sup>, Deniz Yilmaz<sup>89</sup>, Michael  
31 H. Young<sup>90</sup>, Steffen Zacharias<sup>91</sup>, Yijian Zeng<sup>83</sup>, Ying Zhao<sup>92</sup>, Hong Zhao<sup>83</sup>, Harry Vereecken<sup>2,3</sup>

32 1) Department of Soil Science and Engineering, Faculty of Agriculture, University of Maragheh, Maragheh, Iran

33 2) Forschungszentrum Jülich GmbH, Institute of Bio- and Geosciences: Agrosphere (IBG-3), Jülich, Germany

34 3) ISMC International Soil Modeling Consortium

35 4) USDA-ARS Environmental Microbial and Food Safety Laboratory, Beltsville, MD 20705

36 5) Key Laboratory of Dryland Agriculture, Ministry of Agriculture, Institute of Environment and Sustainable  
37 Development in Agriculture, Chinese Academy of Agricultural Sciences, Beijing 100081, PR China

38 6) Department of Watershed Management Engineering, Faculty of Natural Resources, Tarbiat Modares University,  
39 Iran

40 7) Department of Environmental Sciences, Urmia Lake Research Institute, Urmia University, Urmia, Iran

41 8) Institute for Soil Sciences and Agricultural Chemistry, Centre for Agricultural Research, Hungarian Academy of  
42 Sciences, Budapest, Hungary; University of Pannonia, Georgikon Faculty, Department of Crop Production and Soil  
43 Science, Keszthely, Hungary

44 9) Environment Agency - Abu Dhabi, UAE

45 10) Department of Natural Resources and Environment, Faculty of Agriculture, Jordan University of Science and  
46 Technology, P.O. Box 3030, Irbid 22110, Jordan

47 11) Univ Lyon, Université Claude Bernard Lyon 1, CNRS, ENTPE, UMR5023 LEHNA, F-69518, Vaulx-en-Velin,  
 48 France  
 49 12) Universidade Federal de Pernambuco, Centro Acadêmico do Agreste, Núcleo de Tecnologia, Caruaru, Brazil  
 50 13) Hellenic Agricultural Organization, Soil and Water Resources Institute, 57400 Sindos, Greece  
 51 14) Núcleo de Atividades em Engenharia de Biosistemas (NAEB), DSEA-UFPR, Curitiba, PR, Brazil  
 52 15) 15) Department of Soil Science, Faculty of Agricultural Engineering and Technology, University of Tehran. Karaj,  
 53 Iran  
 54 16) Department of Geography, Geo-Informatics and Climatic Sciences, Makerere University, P.O. Box 7062,  
 55 Kampala, Uganda  
 56 17) UMR 1402 INRA AgroParisTech Functional Ecology and Ecotoxicology of Agroecosystems, Institut National de  
 57 la Recherche Agronomique, AgroParisTech B.P. 01 F-78850 Thiverval-Grignon France  
 58 18) UMR 8148 IDES CNRS/Université Paris-Sud XI Bât. 504 Faculté des Sciences 91405 Orsay Cedex, France  
 59 19) Innovative Groundwater Solutions (IGS), Victor Harbor, 5211, South Australia, Australia  
 60 20) LUNAM Université, IIFSTTAR, GERS, EE, F-44344 Bouguenais, France  
 61 21) Freie Universität Berlin, Department of Earth Sciences, Institute of Geographical Sciences, Malteserstr. 74-100,  
 62 Lankwitz, 12249, BERLIN, Germany  
 63 22) Centre for Water Resource Systems, TU Wien, Karlsplatz 13, 1040 Vienna, Austria  
 64 23) Institute of Hydraulic Engineering and Water Resources Management, TU Wien, Karlsplatz 13/222, 1040 Vienna,  
 65 Austria  
 66 24) Faculty of Agricultural and Environmental Sciences, University of Rostock, Germany  
 67 25) Irstea, UE RiverLy, Lyon-Villeurbanne Center, 69625 Villeurbanne, France  
 68 26) Pyrenean Institute of Ecology-CSIC. AV. Montañana 1005 // Av. Victoria s / n. 50059 Zaragoza//22700 Jaca,  
 69 Huesca. Spain  
 70 27) Soil Erosion and Degradation Research Group, Department of Geography, University of Valencia, Valencia, Spain  
 71 28) Plant and Food Research, Mount Albert Research Station, Auckland, New Zealand  
 72 29) Czech Technical University in Prague, Faculty of Civil Engineering, Thákurova 7, 166 29 Prague 6, Czech  
 73 Republic  
 74 30) Plant & Food Research, Palmerston North, New Zealand  
 75 31) ISTO UMR 7327 Université d'Orléans, CNRS, BRGM, 45071 Orléans, France  
 76 32) Department of Soil Management, UNESCO Chair on Eremology, Ghent University, Belgium  
 77 33) Department of Civil and Environmental Engineering, University of Perugia, Perugia, Italy  
 78 34) UniRedentor University Center. BR 356, 25, Presidente Costa e Silva, Itaperuna, Rio de Janeiro, Brazil  
 79 35) Embrapa Solos, Rua Jardim Botânico, 1.024, CEP 22040-060, Jardim Botânico, Rio de Janeiro, RJ, Brazil  
 80 36) Department of Soil Science, Faculty of Agriculture, Ferdowsi University of Mashhad, Mashhad, Iran  
 81 37) Dryland Agricultural Research Institute, Agricultural Research, Education and Extension Organization Maragheh,  
 82 East Azerbaijan, Iran  
 83 38) Scientific Member of Soil and Water Research Department, East Azerbaijan Agricultural and Natural Resources  
 84 Research and Education center, Iran  
 85 39) Agricultural Institute, Centre for Agricultural Research, Hungarian Academy of Sciences, Brunszvik str. 2., H-  
 86 2462 Martonvásár, Hungary  
 87 40) Life and Environmental Sciences, University of California, Merced, United States  
 88 41) Geographisches Institut, Universität Bonn, Germany  
 89 42) Institute of Plant Nutrition and Soil Science, Christian-Albrechts-University zu Kiel, Olshausenstr. 40, 24118 Kiel,  
 90 Germany  
 91 43) Instituto Pirenaico de Ecología, Spanish National Research Council (IPE-CSIC), Avda. Llano de la victoria 16,  
 92 Jaca (Huesca), 22700, Spain  
 93 44) Belgian Nuclear Research Centre, Engineered and Geosystems Analysis, Belgium  
 94 45) Soil, Water and Land Use Team, Wageningen Environmental Research, Wageningen UR, 6708PB Wageningen,  
 95 The Netherlands  
 96 ~~Soil Physics and Land Management Group, Wageningen University, Droevendaalsesteeg 4 6708PB,~~  
 97 ~~Wageningen, the Netherlands~~  
 98 46) Civil, Surveying and Environmental Engineering, the University of Newcastle, Callaghan 2308, Australia  
 99 47) Department of Soil Science, College of Agriculture, Isfahan University of Technology, Isfahan 84156-83111, Iran  
 100 48) Agricultural & Food Engineering Department, Indian Institute of Technology Kharagpur, Kharagpur – 721302,  
 101 West Bengal, India  
 102 49) State Key Laboratory of Earth Surface Processes and Resource Ecology, Faculty of Geographical Science, Beijing  
 Normal University, Beijing 100875 China

103 50) Research Soil Scientist, USDA Agricultural Research Service, P.O. Box 459, 1701 10th Ave., S.W. Mandan, ND  
 104 58554-0459, USA  
 105 51) Institute of Hydrology, Slovak Academy of Sciences, Bratislava, Slovakia  
 106 52) Departamento de Suelo y Agua, Estación Experimental de Aula Dei (EEAD), Consejo Superior de Investigaciones  
 107 Científicas (CSIC), PO Box 13034, 50080 Zaragoza, Spain  
 108 53) ICAR-Central Arid Zone Research Institute, Regional Research Station, Kukma – 370105, Bhuj, Gujarat, INDIA  
 109 54) CSIRO Land and Water, Glen Osmond, South Australia, Australia  
 110 55) PhD student at his first year. Soil Science Graduate Program (ufsm.br/ppgcs), Federal University of Santa Maria,  
 111 state of Rio Grande do Sul, Brazil  
 112 56) Federal Institute of Education, Science and Technology of the Amazonas – IFAM, Campus Center of Manaus,  
 113 Manaus, Brazil  
 114 57) Centre for Ecology and Hydrology, Environment Centre Wales, Deiniol Road, Bangor, Gwynedd LL57 2UW,  
 115 UK  
 116 58) ENGIE Research and Technologies, Simon Bolivarlaan 34, 1000 Brussels, Belgium  
 117 59) ~~Université catholique de Louvain, Earth and Life Institute-Environmental Sciences, Louvain-la Neuve,~~  
 118 ~~Belgium~~  
 119 ~~Université Catholique de Louvain, Earth and Life Institute-Environmental Sciences, Louvain-la Neuve,~~  
 120 ~~Belgium~~  
 121 60) Dep. of Biological and Agricultural Engineering, 2117 TAMU, Texas A&M Univ., College Station, TX 77843-  
 122 2117  
 123 61) ~~Aarhus University, Department of Agroecology, Research Centre Foulum, Blichers Allé 20, P.O. Box 50, DK-~~  
 124 ~~8830 Tjele, Denmark~~  
 125 ~~Instituto de Edafología, Facultad de Agronomía, Universidad Central de Venezuela, Venezuela~~  
 126 62) Universidade Federal de Pernambuco (UFPE), Av. Prof. Moraes Rego, 1235 - Cidade Universitária, Recife - PE  
 127 - CEP: 50670-901. Brazil  
 128 63) Department of Soil Science, College of Agriculture, Shiraz University, Shiraz, Iran  
 129 64) Department of Soil Science and Engineering, Faculty of Agriculture, University of Kurdistan, Sanandaj, Kurdistan  
 130 Province, Iran  
 131 65) Department of Soil Science, Faculty of Agriculture, University of Tabriz, Tabriz, Iran  
 132 66) Department of Hydrology, Geological Survey of Brazil (CPRM), Av. Pauster, 404. CEP 22290-240 Rio de Janeiro  
 133 (RJ), Brazil  
 134 67) Department of Water Resources and Environment, Federal University of Rio de Janeiro, Avenida Athos da Silveira  
 135 Ramos, PO box: 68570, Rio de Janeiro, RJ, Brazil  
 136 68) Soil and Water Research Department, Sistan Agricultural and Natural Resources Research and Education Center,  
 137 Agricultural Research, Education and Extension Organization (AREEO), Zabol, Iran  
 138 69) Department of Soil Science, University of Kassel, Nordbahnhofstr. 1a, 37213 Witzenhausen, Germany  
 139 70) Department of Earth and Environmental Sciences, Catholic University of Leuven, Geo-Institute, Celestijnenlaan  
 140 200E, 3001 Heverlee, Belgium  
 141 71) GeoEnvironmental Research Group, University of Extremadura, Faculty of Philosophy and Letters, Avda. de la  
 142 Universidad s/n, 10071 Cáceres, Spain  
 143 72) Soil Science Department, Federal University of Santa Maria, state of Rio Grande do Sul, Brazil  
 144 73) Instituto de Geomorfología y Suelos, Department of Geography, University of Málaga, 29071, Málaga, Spain  
 145 74) Department of Physical Geography, Trier University, D-54286 Trier, Germany  
 146 75) Civil Engineering Program, Alberto Luiz Coimbra Institute for Postgraduate Studies and Research in Engineering  
 147 (COPPE), Federal University of Rio de Janeiro, Avenida Athos da Silveira Ramos, Rio de Janeiro, RJ, Brazil  
 148 76) Faculty of Agriculture, Tottori University, 4-101 Koyama-Minami, Tottori 680-8553, Japan  
 149 77) Department of Materials and Life Science, Seikei University, 3-3-1, Kichijoji-kitamachi, Musashino, Tokyo 180-  
 150 8633, Japan  
 151 78) Department of Soil Science, College of Agriculture, Isfahan University of Technology, Isfahan, Iran  
 152 79) Plant and Environmental Sciences, New Mexico State University, Las Cruces, New Mexico  
 153 80) Japan International Research Center for Agricultural Science, Rural Development Division, Tsukuba, Japan  
 154 81) Department of Agricultural and Bio-Resources Engineerin, Faculty of Engineering, Ahmadu Bello University  
 155 Zaria, Nigeria  
 156 82) Institute for Land and Water Management Research, Federal Agency for Water Management, Pollnbergstraße 1,  
 157 3252 Petzenkirchen, Austria  
 158 83) Department of Water Resources, ITC Faculty of Geo-Information Science and Earth Observation, University of  
 Twente, Enschede, the Netherlands  
 84) Faculty of Agriculture and Natural Resources, Ardakan University, Ardakan, Yazd Province, Iran

159 85) University of Córdoba, Department of Rural Engineering, 14071 Córdoba, Spain  
 160 86) Soil Physics, Embrapa Soils, Rua Jardim Botânico, 1026, 22460-00 Rio de Janeiro, RJ, Brazil  
 161 87) Department of Soil Science, Agriculture Faculty, University of Zanjan, Zanjan, Iran  
 162 88) Department of Geography, Ruhr-University Bochum, D-44799 Bochum, Germany  
 163 89) Engineering Faculty, Civil Engineering Department, Munzur University, Tunceli, Turkey  
 164 90) Bureau of Economic Geology, John A. and Katherine G. Jackson School of Geosciences, University of Texas at  
 165 Austin, University Station, Box X, Austin, TX  
 166 91) UFZ Helmholtz Centre for Environment Research, Monitoring and Exploration Technologies, Leipzig, Germany  
 167 92) College of Resources and Environmental Engineering, Ludong University, Yantai 264025, China  
 168 93) Soil and Water research Institute, Karaj, Iran  
 169 \*) Correspondence to: Mehdi Rahmati ([mehdirmti@gmail.com](mailto:mehdirmti@gmail.com))

## 170 Abstract

171 In this paper, we present and analyze a **novel** global database of soil infiltration measurements, the Soil Water  
 172 Infiltration Global (SWIG) database, ~~for the first time~~. In total, 5023 infiltration curves were collected across all  
 173 continents in the SWIG database. These data were either provided and quality checked by the scientists who performed  
 174 the experiments or they were digitized from published articles. Data from 54 different countries were included in the  
 175 database with major contributions from Iran, China, and USA. In addition to its **extensive geographical coverage**~~global~~  
 176 ~~spatial coverage~~, the collected infiltration curves cover ~~a time span of research~~ from 1976 to late 2017. Basic  
 177 information on measurement location and method, soil properties, and land use were gathered along with the  
 178 infiltration data, ~~which makes~~ **making** the database valuable for the development of pedo-transfer functions for  
 179 estimating soil hydraulic properties, for the evaluation of infiltration measurement methods, and for developing and  
 180 validating infiltration models. Soil textural information (clay, silt, and sand content) is available for 3842 out of 5023  
 181 infiltration measurements (~76%) covering nearly all soil USDA textural classes except for the sandy clay and silt  
 182 classes. Information on ~~the~~ land use is available for 76 % of experimental sites with agricultural land use as the  
 183 dominant type (~40%). We are convinced that the SWIG database will allow for a better parameterization of the  
 184 infiltration process in land surface models and for testing infiltration models. All collected data and related soil  
 185 characteristics are provided online in \*.xlsx and \*.csv formats for reference, and we add a disclaimer that the database  
 186 is for use by public domain only and can be copied freely by referencing it. Supplementary data are available  
 187 at <https://doi.org/10.1594/PANGAEA.885492>~~https://doi.pangaea.de/10.1594/PANGAEA.885492~~. Data quality  
 188 assessment is strongly advised prior to any use of this database. Finally, we would like to encourage scientists to  
 189 extend/update the SWIG by uploading new data to it.

190 **Keywords:** Infiltration, Land surface models, Land use, Pedo-transfer functions

## 191 Graphical Abstract

192 <<Figure 1 about here>>

## 1 Introduction

Infiltration is the process by which water enters the soil surface and it is one of the key fluxes in the hydrological cycle and the soil water balance. Water infiltration and the subsequent redistribution of water in the subsurface are two important processes that affect the soil water balance (Campbell, 1985; Hillel, 2003; Lal and Shukla, 2004; Morbidelli et al., 2011) and influence several soil processes and functions including availability of water and nutrients for plants, microbial activity, erosion rates, chemical weathering, and soil thermal and gas exchange between the soil and the atmosphere (Campbell, 1985). Infiltration plays a definitive role in maintaining soil system functions and as it is a key process that controls several of the United Nations Goals for Sustainability (Keesstra et al., 2016). The generation of surface runoff, a key factor in controlling floods, is also directly related to the infiltration process. Water that cannot infiltrate in the soil becomes available for surface runoff. Two main mechanisms are responsible for the generation of excess water that produce overland flow: Dunne saturation excess and Hortonian infiltration excess (Sahoo et al., 2008). Dunne overland flow, or saturation excess, occurs when the soil profile is completely saturated and precipitation can no longer infiltrate into soil. The Dunne mechanism is more common to near-channel areas or is generated from partial areas of the hillslope where water tables are shallowest (Sahoo et al., 2008). On the other hand, Hortonian overland flow is characterized by rainfall intensities exceeding the infiltration rate of the soil. In other words, during a rainfall event, water infiltration at the soil surface and runoff are highly dependent on the boundary conditions, namely, the rainfall intensity and the soil hydraulic properties. If the rainfall intensity is less than the soil infiltrability, soil infiltration rate, water will completely infiltrate into the soil without any runoff (Hillel, 2013). In this case, the infiltration rate align with the rainfall intensity. Otherwise, if the precipitation intensity exceeds the soil infiltration rate at a certain moment in time, excess water will be generated even if the soil profile is unsaturated. In this case water will pond on the soil surface and becomes available for surface runoff. If this occurs, the boundary condition at the soil surface undergoes a shift in the dominate flow process from one governed by capillary action, to one governed by pressures of hydraulic head. Assuming that the water pressure heads remain constant at the soil surface, the infiltration rate described by a decreasing function over time, tending towards the value of the hydraulic conductivity, corresponding to the water pressure head at the surface (Angulo et al., 2016; Chow et al., 1988). In the past decades, water infiltration tests, using either ponded or tension infiltrometers have been developed to quantify the cumulative infiltration at the soil surface. In these cases, the 3D axisymmetric water infiltration corresponds to an upper boundary defined by a constant water pressure head or a series of constant water pressure heads. For these reasons, infiltration plays a definitive role in maintaining soil system functions and as it is a key process that controls several of the United Nations Goals for Sustainability (Keesstra et al., 2016).

The infiltration process is quantified usually studied by determining the infiltrated amount of water which infiltrates, versus over time, from which the cumulative infiltration,  $I(t)$ , [L], and the infiltration rate,  $i(t)$ , [ $L T^{-1}$ ] can be derived.  $i(t)$  and  $I(t)$  are related to each other by derivation (Campbell, 1985; Hillel, 2003; Lal and Shukla, 2004):

$$i(t) = \frac{dI(t)}{dt} \quad (1)$$

As stated above, the infiltration rate  $i(t)$  is expected to decrease to a plateau defined by the value of the hydraulic conductivity corresponding to the imposed water pressure head plus a term related to radial water infiltration (Angulo

et al., 2016). In the case of large rings, the final infiltration rate approaches the value of the hydraulic conductivity corresponding to the imposed water pressure head (gravity flow). Consequently, if water ponding is imposed at surface,  $i(t)$  tends towards the saturated hydraulic conductivity. ~~In general, the soil infiltration rate decreases nonlinearly over time and approaches a constant value after long infiltration time.~~ Infiltration into the soil is controlled by several factors including soil properties (e.g., texture, bulk density, initial water content), layering, slope, cover condition (vegetation, crust, and/or stone), rainfall pattern (Smith et al., 2002; Corradini et al., 2017) and time. As soil texture and soil surface conditions (e.g., cover) are independent of time at the scale of individual infiltration events, these characteristics can be assumed to be constant during the event. On the other hand, soil structure, especially at the soil surface, can rapidly change, for instance, due to tillage, grazing or the destruction of soil aggregates by rain drop impact. In dry soils, initial infiltration rates are substantially higher than the saturated hydraulic conductivity of the surface layer due to capillary effects which control the sorptivity of the soil. However, as infiltration proceeds, the gradient between the pressure head at the soil surface and the pressure head below the wetting front reduces over time so that the infiltration rate finally reaches a constant value that approximates saturated hydraulic conductivity (Chow et al., 1988).

Infiltration measurements have been largely used to estimate soil saturated hydraulic conductivity. This soil property is a key to correctly describe all the components of the soil and land surface hydrologic balance, and is essential in the appropriate design of irrigation systems. ~~Within the literature it is clear that extensive efforts have been made to estimate this property~~ Large efforts have been invested in literature to estimate this property from basic soil properties using pedo-transfer functions (PTFs). PTFs are knowledge-based rules or equations that relate simple soil properties to those properties of soil that are more difficult to obtain (Van Looy et al., 2017). Most of these efforts have been based on measurements made on samples of disturbed or undisturbed soil material. With this infiltration database, data is now made available that may contribute to better predict the saturated soil hydraulic conductivity and demonstrate the effect of e.g. vegetation and land management on the parameters of interest.

The Richards (1931), Eq. (2), written as a function of soil water content ~~which is often referred to as the Fokker-Planck water diffusion equation~~ can be used to derive the closed-form expression of the infiltration rate in partially saturated soils.

$$\frac{\partial \theta}{\partial t} = \frac{\partial}{\partial z} \left( D_z(\theta) \frac{\partial \theta}{\partial z} + K_z(\theta) \right) \quad (2)$$

where  $\theta$  is the volumetric soil water content [ $L^3 L^{-3}$ ],  $t$  is the time [T],  $z$  is the vertical depth position [L],  $K(\theta)$  is the soil hydraulic conductivity [ $L T^{-1}$ ], and  $D(\theta)$  is soil water diffusivity [ $L^2 T^{-1}$ ], which is defined by Eq. (3) (Childs and Collis-George, 1950; Klute, 1952):

$$D_z(\theta) = K_z(\theta) \frac{\partial h}{\partial \theta} \quad (3)$$

where  $h$  is the matric potential in head units [L]. The exact relationships between soil water content, soil matric potential, and soil hydraulic conductivity are necessary to solve the Richards equation. Several solutions of the Richards equation and many empirical/conceptual/semi-analytical/physically-based models, e.g., Green and Ampt (1911); Philip (1957); Smith and Parlange (1978); Haverkamp et al. (1994); Corradini et al. (2017), have been

introduced to describe the infiltration process over time, even for preferential flows, e.g. Lassabatere et al. (2014). Furthermore, several direct or indirect experimental systems have been introduced to measure soil infiltration ~~at-in~~ the laboratory or in the field under different conditions (Gupta et al., 1994; McKenzie et al., 2002; Mao et al., 2008a). Data obtained from these systems can also be used to deduce soil saturated hydraulic conductivity directly. Methods developed to measure and quantify water infiltration in soil are generally time consuming and costly. Therefore, PTFs have been developed and applied by many researchers, e.g., Jemsi et al. (2013), Parchami-Araghi et al. (2013), Kashi et al. (2014), Sarmadian and Taghizadeh-Mehrjardi (2014), and Rahmati (2017), in order to easily parameterize infiltration models. However, these PTFs have been developed for specific regions often limiting their applicability. As already mentioned, a large number of publications reporting soil infiltration data is available, but these data are dispersed in the literature and often difficult to access. Therefore, the aim of this data paper is to present and make available a collection of infiltration data digitized from available literature and from published or unpublished data provided directly by researchers around the world. These data are accompanied by metadata, which provide information about the location of ~~the~~ infiltration measurement, soil properties, and land management. Finally, we will provide some first results highlighting the suitability of the database for further research. The main article is also accompanied by a supplement providing more detailed information about the different methodologies to measure soil infiltration. This is added because many of readers are likely not well-versed in soil infiltration, its limitations in measurement and modeling. For more detailed information on this, readers could refer to Smith (2002), Corradini et al. (2017), and Hopmans et al. (2006).

## 2 Method and Materials

### 2.1 Data collection

We collected infiltration measurements from ~~all-over-the-globe~~ ~~different countries/regions~~ by contacting the data owners or by extracting infiltration data from published literature. To do this, a data request was sent to potential data owners through different forums and email exchanges. The flyer asked data owners to cooperate in the development of the SWIG database by providing infiltration data as well as metadata about experimental conditions (e.g. initial soil moisture content at the start of the experiment, method used), soil properties, land use, topography, geographical coordinates of the sites and any other information relevant to interpret the data and to increase the value of the database. Infiltration data reported in literature were digitized and included in the database together with additional information provided in these papers. The digitization approach is discussed in Sect. 2.2. In total, 5023 single infiltration curves were collected of which 510 infiltration curves were digitized from 74 published papers (Table 1) and 4513 were provided by 68 different research teams (Tables 2 ~~and 3~~) being published or unpublished data. The references and correspondences for data supplied by direct communications with researchers are also reported in Tables 2 ~~and 3~~. Therefore, users may refer to these references for detailed information about the applied methods or procedures.

<<Table 1 about here>>

<<Table 2 about here>>

<<Table 3 about here>>



## 2.2 Data digitization

In order to digitize infiltration curves reported in literature, screenshots of the relevant plots were taken, and figures were imported into the *plot digitizer* 2.6.8 (Huwaldt and Steinhorst, 2015). First, the origin of the axes as well as the highest  $x$  and  $y$ -values were defined and the diagram plane was spanned. Then, all point values were picked out and an output table with the  $x - y$  pairs (time vs. infiltration rate or cumulative infiltration) was generated and stored.

## 2.3 Database structure

The SWIG database is prepared in \*.xlsx with a backup file in \*.CSV formats containing several datasets. Supplementary data are available at <https://doi.org/10.1594/PANGAEA.885492> ~~https://doi.pangaea.de/10.1594/PANGAEA.885492~~. The first dataset, named  $I_{cm}$ , contains cumulative infiltration data in centimeter units, and are referred to as  $I_{xxxx}$ , whereby  $xxxx$  is the identifier of the individual infiltration test. The corresponding time intervals in hours for the infiltration data are labeled  $T_{Hour}$  and named  $T_{xxxx}$ . The constant or varying pressure or tension heads (if any) during infiltration measurements are also reported in another dataset named  $Tension_{cm}$ . The database also contains additional variables and information relevant to the infiltration data provided by data owners or digitized from articles, as listed in Table 43, and which is labelled *Metadata*. ~~Additional soil properties were determined by different standards, therefore data harmonization might be needed for some of those, especially in case of water content at field capacity, pH or wet-aggregate stability. Further information on measurement methods is available from references of the data.~~ Since the geometric mean diameter ( $d_g$ ) and standard deviation ( $S_g$ ) of soil particle sizes are rarely measured, both parameters were computed using the following equations (Shirazi and Boersma, 1984):

$$d_g = \exp(a), \quad a = 0.01 \sum_{i=1}^n f_i \ln D_i \quad (4)$$

$$S_g = \exp(b), \quad b^2 = 0.01 \sum_{i=1}^n f_i \ln^2 D_i - a^2 \quad (5)$$

where  $f_i$  is the percent of total soil mass having diameters equal to or less than arithmetic mean of interval limits ( $D_i$ ) that define three main fractions (i) of clay, silt, and sand with mean values of 0.001, 0.026, 1.025 mm.  ~~$M_i$  corresponds to clay, silt, and sand fractions having the arithmetic mean of two consecutive particle size limits of 0.01, 0.026, and 1.025 mm, respectively.~~ For the infiltration data, where the soil texture is unknown,  $d_g$  and  $S_g$  could not be calculated and the data field in the database was left empty. The database also contains the locations of the experimental sites in another dataset named *Locations* that provides the approximate latitude and longitudes in decimal degree (dd.dd) format. Tables 2 and 3 are also provided in the SWIG database in two other worksheets named *Ref. for digitized data* and *Ref. for data provided by owner* for corresponding issues.

<< Table 4-3 about here>>



## 329

## 330

331  
332  
333  
334  
335  
336  
337  
338  
339  
340  
341  
342  
343  
344  
345  
346  
347

348

350

351

352

353

354

## 355

356  
357  
358  
359  
360  
361  
362  
363

**Formatted:** Font: (Default) Times New Roman, 10 pt,  
Complex Script Font: Times New Roman, 10 pt

**Formatted:** Space After: 0 pt

loam, silty loam, and clay loam contributed with 19, 18, 14, and 13 % (Table 65) to the infiltration measurements, respectively. Table 6-5 shows that infiltration measurements are almost equally distributed among textures when these are categorized in three major classes: course- (1092), medium- (1238), and fine to moderately fine-textured soils (1447). Table 7-6 reports on the soil properties that are available in SWIG and it gives some simple statistics such as mean, minimum, maximum, median, and coefficient of variation. Bulk density (available for 66 % of infiltration measurements) and organic carbon content (available for 62 % of infiltration measurements) are two other soil properties besides texture that have the highest frequency of availability. Saturated hydraulic conductivity, initial soil water content, saturated soil water content, calcium carbonate equivalent, electrical conductivity, and pH are available in 22 to 38 % of infiltration data. The other soil properties have a frequency lower than 10 %.

<<Figure 3-6 about here>>

<<Table 6-5 about here>>

<<Table 7-6 about here>>

### 3.3 Infiltration measurements in the SWIG database

Different instruments were used to measure soil water infiltration (Table 8). About 32% (1595 out of 5023) of the measurements were carried out using different types of ring infiltrometers. The most frequently used methods are the disc infiltrometer methods (disc, mini-disc, and micro-disc, hood, and tension infiltrometers), which have been used in about 51% of the experiments. About 5% of the data were submitted to the database without specifying the measurement method (251 infiltration tests) and around 12 % of the measurements were carried out with other methods not listed above (Table 87).

<<Table 8-7 about here>>

### 3.4 Land use classes represented in the SWIG database

Land use is known to potentially impact soil structure and then water infiltration into soils (e.g., Ilstedt et al., 2007; Waterloo et al., 2007). Consequently, we collected information on the type of land use at all experimental sites where available. Since land use is one of the most important factors affecting soil surface processes including water infiltration in soils, we collected information on the type of land use at all the experimental sites when available. In general, the type of land use was reported in 3818 out of 5023 infiltration curves (~76 %) and this information is reported in the *Metadata* dataset. For simplicity, we grouped all reported land use types into 22 major groups (Table 98). A frequency analysis showed that agricultural land use, i.e. cropped land, irrigated land, dryland, and fallow land, is the most frequently reported land use in the database with about 53% (2019 out of 3818) of all land uses. With 22%, grasslands are the second most frequently represented land use type. Pasture with 6 % and forest with 5 % are ranked as third and fourth largest reported land use types. The 18 remaining land use types all together cover only 545 experimental sites (less than 15%).

<<Table 9-8 about here>>

### 3.5 Estimating infiltration parameters from infiltration measurements

In order to predict infiltration parameters from infiltration measurements, we classified the SWIG infiltration curves in two groups: i) infiltration curves that were obtained under the assumption of 1D infiltration and ii) infiltration curves that were obtained under 3D flow conditions. We fitted the three-parameter infiltration equation of Philip (Kutílek and Krejča, 1987), Eq. (6), to the 1D experimental data and the simplified form of Haverkamp et al. (1994), Eq. (7), to the 3D experimental data:

$$I_{1D} = S t^{\frac{1}{2}} + A_1 t + A_2 t^{\frac{3}{2}} \quad (6)$$

$$I_{3D} = S \sqrt{t} + \left[ \frac{2-\beta}{3} K_{sat} + \frac{\gamma S^2}{R_d (\theta_s - \theta_i)} \right] t \quad (7)$$

We reduced the number of parameters in Eq. (6) by defining  $A_1=0.33 \times K_{sat}$  (Philip, 1957) and  $A_2=A$  where  $A$  was assumed to be a constant. In Eq. (7), we put  $\beta = 0.6$  (Angulo-Jaramillo et al., 2000) and the second term between brackets on the right hand side was assumed to be a constant. Therefore, we simplified the equations as follows:

$$I_{1D} = S t^{\frac{1}{2}} + 0.33 K_{sat} t + A t^{\frac{3}{2}} \quad (8)$$

$$I_{3D} = S \sqrt{t} + 0.47 K_{sat} t + A t \quad (9)$$

In our analysis, we assumed that double ring infiltrometer measurements result in 1D infiltration conditions, while the different types of disc infiltration and single ring infiltrometer measurements lead to 3D flow conditions that can be captured by Eq. (9). As 1D or 3D infiltration conditions are not guaranteed for measurements made with rainfall simulators, Guelph permeameters, Aardvark permeameters, linear and point source methods as well as Hood infiltrometer measurements, these infiltration curves were not considered in our first analysis. By excluding these methods, 596 infiltration curves were excluded from the fitting to Eq. (8) and (9). In addition, 251 infiltration curves were also excluded from the fitting to Eq. (8) and (9) as no indication was available on the measurement method used. In total, 4178 infiltration curves were included in our analysis of which 828 infiltration curves reflected 1D and 3350 were considered as the results of 3D infiltration. As no sufficient information was available on the properties of the sand contact layer, we did not correct 3D infiltration measurements. Finally, the selected infiltration curves were fitted to Eq. (8) or (9) using the `lsqnonlin` command in- **Matlab™**.

The fitting results of Eq. (8) to the single infiltrometer data are shown in Table 409.  $R^2$  values were higher than 0.9 in 97 % of the cases and higher than 0.99 in 77 % of the cases. Fitting Eq. (9) to the 3D infiltration curves data,  $R^2$  values higher than 0.9 and 0.99 were obtained in 94 and 68% of the cases, respectively. The statistics for the fitting process as well as the fitted parameters of two mentioned models are reported in the SWIG database in an additional dataset labelled *Statistics*. For infiltration curves excluded from the analysis, an empty cell is reported.

<<Table 409 about here>>

The average values of estimated  $K_{sat}$  and sorptivity ( $S$ ), using Eq. (8) or (9) as well as measured  $K_{sat}$  for different soil texture classes extracted from the current database is reported in Table 410. The measured values of  $K_{sat}$  were

**Formatted:** Font: Italic, Complex Script Font: Italic

**Formatted:** Font: Italic, Complex Script Font: Italic, Subscript

429 obtained by other means by the contributors and tabulated in the SWIG database. More detailed information of how  
 430  $K_{sat}$  was calculated in individual cases can be found in the references linked to those data points. Comparison between  
 431 estimated ( $K_{sat-es}$ ) and measured ( $K_{sat-m}$ ) values of  $K_{sat}$  (Table 4-10) reveals that there is reasonably good  
 432 agreement between measurements and estimation, except for loamy sand (with mean  $K_{sat-es} = 62 \text{ cm h}^{-1}$  vs.  $K_{sat-m}$   
 433  $= 25 \text{ cm h}^{-1}$ ), sandy loam (with mean  $K_{sat-es} = 32 \text{ cm h}^{-1}$  vs.  $K_{sat-m} = 41 \text{ cm h}^{-1}$ ), silt loam (with mean  $K_{sat-es} = 27$   
 434  $\text{cm h}^{-1}$  vs.  $K_{sat-m} = 3 \text{ cm h}^{-1}$ ), and silty clay (with mean  $K_{sat-es} = 26 \text{ cm h}^{-1}$  vs.  $K_{sat-m} = 45 \text{ cm h}^{-1}$ ) textural classes.  
 435 However, the only significant difference between measured and estimated  $K_{sat}$  values was found for the silt loam  
 436 textural class (Table 4-10) applying an independent T test.  
 437 We also compared our estimated  $K_{sat}$  values from the infiltration measurements from the SWIG database with  $K_{sat}$   
 438 values from databases that have been published in the literature (Table 4-11). The validity of our estimated Ks values  
 439 is confirmed by comparing the order of magnitude of difference between these values, and those tabulated in previous  
 440 studies, for the various different soil classes. Some of these databases like the one of Clapp and Hornberger (1978)  
 441 and Cosby et al. (1984) have been used to parameterize land surface models. Most of the  $K_{sat}$  values in the listed  
 442 databases have been obtained from laboratory lab-scale measurements often performed on disturbed soil samples. In  
 443 most of the reported databases  $K_{sat}$  is controlled by texture with the highest mean values obtained for the coarse  
 444 textured and the lowest mean values for the fine textured soils. This is not the case for the  $K_{sat}$  values obtained from  
 445 the SWIG database. Clayey soils have a mean value that is similar to the coarser textured soils. This may be partly  
 446 explained by the fact that the measurements collected in the SWIG database are obtained from field measurements on  
 447 undisturbed soils. It was observed that the standard deviation of  $K_{sat}$  in the SWIG database is typically larger than the  
 448 standard deviations obtained from the databases in literature. This indicates that texture is apparently not the most  
 449 important control on  $K_{sat}$  values. However, one would also pose that much of the lack of correlation between soil  
 450 texture and predicted  $K_{sat}$  from the SWIG database is related to the lack of soil structural information, such as macro  
 451 porosity quantification or other possible soil attributes. Indeed, many of the data sets presented in our paper on  
 452 saturated and near-saturated flow can be used to infer the 'state' of the soil's structure, namely its macroporosity, by  
 453 using the slope of the near-saturated conductivity curve, via Philip's 'flow-weighted mean pore-size' analysis. White  
 454 and Sully (1987) have discussed this in a great detail. Zhang et al. (2015) is another example of where tension  
 455 infiltrometers can be used to describe the temporal dynamics of the macroporosity which characterizes 'soil structure'.  
 456 This could inspire researchers to collect such information when conducting additional soil infiltration measurements,  
 457 and include this in the database in the future. This finding indicates that present parameterization in currently used  
 458 land surface models, which are mainly based on texture, may severely underestimate the variability of  $K_{sat}$ . In addition,  
 459 it shows that also mean values are not dominantly controlled by textural properties. Other land surface properties such  
 460 as land use, crusting, etc. may, in fact, turn out to be much more important.

Formatted: Font: Italic, Complex Script Font: Italic

Formatted: Font: Italic, Complex Script Font: Italic, Subscript

461 <<Table 4-10 about here>>

462 <<Table 4-11 about here>>

### 3.6 Exploring the SWIG database using principal component analysis

In order to demonstrate the potential of the SWIG database for analyzing infiltration data and for developing pedo-transfer functions, principal component analysis (PCA) was performed and biplots were generated to show both the observations and the original variables in the principal component space (Gabriel, 1971).

In a biplot, positively correlated variables are closely aligned with each other and the larger the arrows the stronger the correlation. Arrows that are aligned in opposite directions are negatively correlated with each other and the magnitude of the arrows is again a measure for the strength of the correlation. Arrows that are aligned 90 degrees to each other show typically no correlation. Figures 4-7 and 5-8 show the results of two PCA. The first PCA (Fig. 4-7) shows the relationship between soil textural properties,  $S$  and  $K_{sat}$  based on 3267 infiltration measurements. The first two principal components explain 74.5% of the variability in the data. Figure 4-7 shows a positive correlation between  $K_{sat}$  and  $S$  (0.527) and the largest values for both variables are found in clay soils. Clay content appears only to be weakly correlated with  $K_{sat}$  and  $S$  as is also shown by the correlation coefficients of 0.112 and 0.025 respectively. Figure 5 shows the biplot of soil textural properties— with  $K_{sat}$ ,  $S$ , organic carbon content, and bulk density in the principal component space - based on 1910 infiltration measurements. The first two principal components still explain 55% of the variability. Neither  $S$  nor  $K_{sat}$  showed appreciable correlations with available soil properties. Only  $K_{sat}$  and  $S$  are correlated (arrows are aligned but small) with a value of 0.29. Organic carbon and bulk density show a negative correlation with a calculated value equal to -0.51. It also shows that for example the sandy clay loam textural class (yellow dots) shows a wide spread in organic matter content and bulk densities. These analyses show that the examined basic soil properties do not contain enough information to properly estimate  $K_{sat}$  and  $S$ . However, the SWIG database provides additional information like such as land use, initial water content and slope that might prove to be good predictors. A further analysis in this respect is however beyond the scope of this paper. More importantly, the present analysis in combination with the results provided in Table 12 shows that a texture dominated derivation of  $K_{sat}$  values, as implemented in most land surface models, does not provide adequate means to estimate  $K_{sat}$ .

<<Figure 4-7 about here>>

<<Figure 5-8 about here>>

### 3.7 Potential error and uncertainty in the SWIG database

Similar to any other databases, the data presented in the SWIG database may be subject to different error sources and uncertainties. These include: 1) transcription errors that occurred when implementing the measurement data into the EXCEL spreadsheets, 2) inaccuracy and uncertainties in determining related soil properties such as textural properties, 3) violation of the underlying assumption when performing the experiments, and 4) uncertainty (variability) in estimated soil hydraulic properties due to the different measurement methods. Unfortunately, none of these errors or uncertainty sources are under the control of the SWIG database authors and quantification of these sources is often difficult, since the required information is often lacking. The uncertainty and variability related to the applied measurement techniques on-for estimated soil hydraulic properties may be assessed as information on the applied

techniques is available--; however, Yet some of these methods may only have been used in few cases making a statistical analysis difficult.

With respect to the transcription error, a strong effort has been made to double check data transcription to prevent or at least to minimize any probable error of this nature. Values of soil properties such as textural composition are known to vary strongly between different laboratories labs and measurement methods. This is especially true for the finer textural classes like clay. Unfortunately, information on the measurement used to determine soil properties is ~~most of the time lacking~~ mostly lacking or insufficient to assess the magnitude of errors or biases. Internationally, there are a number of typically more than one standard methods used to measure soil properties and several methods may have been applied to measure the reported soil characteristics properties. In this regard, no conversion has been made and only raw data are reported in database. However, we have supplied the references for all data (if where available) that can be used to ascertain which methodologies were used, if so desired. people can check the methodologies if needed.

Although supplying such information for each soil property may facilitate the use of the database, but it would have required considerable will need a lot of additional work that could not be performed at this stage of development of the database. Such a work could be the purpose of additions could form the basis of a second version of the database that any readers should feel free to undertake to commence.

The uncertainty with respect to the effect of measurement techniques on quantifying the infiltration process itself may be analyzed from the SWIG database as it provides information on the type of measurement technique used. This analysis is however again beyond the scope of the this paper. Potential error and uncertainty sources with respect to the use of different measurements are discussed in the supplementary material. The uncertainty on of estimated soil hydraulic properties from infiltration measurements may be strongly controlled by the person performing the experiment but may also be due the different measurement windows of the methods in terms of measurement volume. The SWIG database provides information to quantify uncertainties introduced by difference in measurement volume and this analysis will be closely related to the assessment of the representative elementary volume, REV (see e.g. the work of Pachepsky on the scaling of saturated hydraulic conductivity).

Careful interpretation of the data, in respect to the details of the experimental and soil conditions, is also required when utilizing the SWIG. For instance, the cases of soils coded 1211 – 1420 may at first seem odd, as they display very low infiltration rates for soils of a very high (>95%) sand content; however, these unusual findings are explained by the soils being recorded as displaying water repellent characteristics. Another case in the SWIG database that users may find odd are the relatively low infiltration rates for some water repellent soils with very high sand content (>95%); for example those soils coded 1211 to 1420. Thus, the user needs to carefully interpret the data to understand the soil and experimental conditions. Another example is estimated values of  $K_{sat}$  from clayey soils showing high values of  $K_{sat}$  (e.g., soils coded 3746 to 3833 in SWIG). The  $K_{sat}$  values for these soils were obtained using the single ring infiltrometer method (Gonzalez-Sosa et al., 2010; Braud, 2015; Braud and Vandervaere, 2015), and were conducted in the field under ponded conditions, with vegetation cut but roots left in place. Macropores can could have been activated, leading to infiltration rate much higher than expected for clayey soils. Very There were also instances of very high values were being obtained for forested land uses, and sometimes for grassland, probably explained by the visible cracks in the soil surface present in those cases though cracks were visibly present in those cases.

534

### 535 3.8 Research potentials of the SWIG database

536 We envision that SWIG offers a unique opportunity and information source to 1) evaluate infiltration methods and to  
537 assess their value in deriving soil hydraulic properties, 2) test different models and concepts for point scale and grid  
538 scale infiltration processes, 3) develop pedo-transfer functions (PTFs) to estimate soil hydraulic properties such as the  
539 Mualem van Genuchten parameters, 4) identify controls on infiltration processes, 5) validate global predictions of  
540 infiltration from land surface models, 6) study more complex processes like preferential flow in soils, and 7) highlight  
541 the state of the art on understanding of the relationships between infiltration and several soil surface characteristics,  
542 for example the SWIG database has already contributed to the effectively can contribute to the scope of Morbidelli et  
543 al. (2018) to advance the knowledge of infiltration over sloping surfaces.

544 We are confident that the SWIG database is just a first step in collecting and archiving infiltration data and we expect  
545 that increasing amounts of more and more data will become available in the near future. These data will be archived  
546 in SWIG and thus made available to the world-wide research community. In this regard, we are interested in receiving  
547 existing or newly measured infiltration curves and for this purpose the corresponding author will serve as point of  
548 contact or data can be made available through the International Soil Modeling Consortium, ISMC ([https://soil-  
549 modeling.org/](https://soil-modeling.org/)), for further archiving in the SWIG.

### 550 4 Conclusion

551 We have collected 5023 infiltration curves from field experiments from all over the world covering a broad range of  
552 soils, land uses and climate regions. We estimated saturated hydraulic conductivity,  $K_{sat}$ , and sorptivity from more  
553 than 3000 infiltration curves and compared estimated  $K_{sat}$  values with values from different databases published in  
554 literature. We showed that contrary to the assumption made in many land surface and global climate models, texture  
555 is not the main controlling factor for  $K_{sat}$ . In addition, the variability in  $K_{sat}$  derived from these field measurements  
556 is considerably larger than reported in the literature. The collected infiltration curves were archived as the SWIG  
557 database on the PANGAEA platform and are therefore available world-wide available. The data are structured into  
558 \*.xlsx and \*.csv files and include metadata information for further use. Data analysis revealed that infiltration curves  
559 are lacking for clayey, sandy textured and stony soils. Also infiltration curve data are lacking for the Northern and  
560 permafrost regions. Here additional efforts are needed to collect additional more data as these regions are particularly  
561 sensitive to climate change which will clearly affect the soil hydrology.

### 562 Acknowledgments

563 - ~~Authors gratefully thank the International Soil Modeling Consortium (ISMC) and the International Soil and~~  
564 ~~Tillage Organization (ISTRO) for their help in distributing our call for data among researchers in the world.~~  
565 First author thanks the International & Scientific Cooperation Office of University of Maragheh, Iran as well  
566 as the Research Committee and Board Members of the University for their assist to conduct the current work.

Formatted: Font: (Default) Times New Roman, 10 pt,  
Complex Script Font: Times New Roman, 10 pt



- 567 - The financial support received from the Forschungszentrum Jülich GmbH is gratefully acknowledged by the  
568 first author.
- 569 - Authors gratefully thank the International Soil Modeling Consortium (ISMC) and the International Soil and  
570 Tillage Organization (ISTRO) for their help in distributing our call for data among researchers in the world.
- 571 - Parts of data were gathered from the work that was supported by the UK-China Virtual Joint Centre for  
572 Agricultural Nitrogen (CINAg, BB/N013468/1), which is jointly supported by the Newton Fund, via UK  
573 BBSRC and NERC.
- 574 - The French Claduègne and Yzeron data sets were acquired during the ANR projects FloodScale (ANR-2011-  
575 BS56-027) and AVuUR (ANR-07-VULN-01) respectively. Also,
- 576 - Parts of the database were made available through research work carried out in the framework of LIFE+  
577 projects funded by the EC.
- 578 - The Spanish Ministry of Economy is acknowledged for support through project CGL2014-53017-C2-1-R.  
579 CGL2014-53017-C2-1-R. The Czech Science Foundation is acknowledged for support through project No.  
580 16-05665S. Authors are also greatfull for Prof. Dr. Atilla Nemes and Prof. Dr. Jan W. Hopmans for their  
581 time and attentions on reviewing and commenting this article. We do blieve that the article got improved  
582 very well using their valuable comments.
- 583 - The Czech Science Foundation is acknowledged for support through project No. 16-05665S.
- 584 - Authors are greatfull for Prof. Dr. Atilla Nemes, Prof. Dr. Jan W. Hopmans and Prof Dr. Marnik Vanclooster  
585 for their time and attentions on reviewing and commenting this article. Authors do blieve that the article got  
586 improved very well using their valuable comments.

## 587 References

- 588 Abagale, F. K., Abdulai, N., and Ojedian, J. O.: Effect of shea waste slurry on soil physical porperties in peri urban  
589 Tamale, Asian Journal of Science and Technology, 4, 36-41, 2012.
- 590 Abdallah, N. A., Wua, L. T., Widaa, A., and Elamin, M. B.: Rain infiltration into loess soil under different rain  
591 intensities and slope angles, International Journal of Scientific Engineering and Applied Science (IJEAS), 2, 179-  
592 183, 2016.
- 593 Adindu Ruth, U., Igbokwe kelechi, K., Chigbu Timothy, O., and Ike-Amadi, C.: Application of Kostiaikov's  
594 Infiltration Model on the Soils of Umudike, Abia State-Nigeria, American Journal of Environmental Engineering, 4,  
595 1-6, 2014.
- 596 Al-Azawi, S. A.: Experimental evaluation of infiltration models, Journal of Hydrology (New Zealand), 24, 77-88,  
597 1985.
- 598 Al-Ghazal, A.: Effect of tractor wheel compaction on bulk density and infiltration rate of a loamy sand soil in Saudi  
599 Arabia, Emir. J. Agric. Sci, 14, 24-33, 2002.
- 600 Al-Kayssi, A., and Mustafa, S.: Modeling gypsiferous soil infiltration rate under different sprinkler application rates  
601 and successive irrigation events, Agricultural Water Management, 163, 66-74, 2016.

**Formatted:** Font: (Default) Times New Roman, 10 pt,  
Complex Script Font: Times New Roman, 10 pt

**Formatted:** List Paragraph, Bulleted + Level: 1 +  
Aligned at: 0.63 cm + Indent at: 1.27 cm

**Formatted:** Font: (Default) Times New Roman, 10 pt,  
Complex Script Font: Times New Roman, 10 pt

**Formatted:** List Paragraph, Bulleted + Level: 1 +  
Aligned at: 0.63 cm + Indent at: 1.27 cm

**Formatted:** Font: (Default) Times New Roman, 10 pt,  
Complex Script Font: Times New Roman, 10 pt

**Formatted:** Font: (Default) Times New Roman, 10 pt,  
Complex Script Font: Times New Roman, 10 pt

**Formatted:** Font: (Default) Times New Roman, 10 pt,  
Complex Script Font: Times New Roman, 10 pt

**Formatted:** Font: (Default) Times New Roman, 10 pt,  
Complex Script Font: Times New Roman, 10 pt

**Formatted:** (Complex) Persian, English (United States)

**Formatted:** Font: (Default) Times New Roman, 10 pt,  
Complex Script Font: Times New Roman, 10 pt

**Formatted:** (Complex) Persian, English (United States)

**Formatted:** Font: (Default) Times New Roman, 10 pt,  
Complex Script Font: Times New Roman, 10 pt

**Formatted:** Font: (Default) Times New Roman, 10 pt,  
Complex Script Font: Times New Roman, 10 pt

602 Al Yamani, W., Green, S., Pangilinan, R., Dixon, S., and Clothier, B.: Sustainable Irrigation of Arid Forests in Abu  
603 Dhabi using Groundwater and Treated Sewage Effluent, Integrated nutrient and water management for sustainable  
604 farming, 2016.

605 Alagna, V., Bagarello, V., Di Prima, S., Giordano, G., and Iovino, M.: Testing infiltration run effects on the estimated  
606 water transmission properties of a sandy-loam soil, *Geoderma*, 267, 24-33, 2016.

607 Angulo-Jaramillo, R., Vandervaere, J.-P., Roulier, S., Thony, J.-L., Gaudet, J.-P., and Vauclin, M.: Field measurement  
608 of soil surface hydraulic properties by disc and ring infiltrometers: A review and recent developments, *Soil and Tillage  
609 Research*, 55, 1-29, 2000.

610 [Angulo-Jaramillo, R.; Bagarello, V.; Iovino, M.; Lassabatère, L.: Infiltration Measurements for Soil Hydraulic  
611 Characterization; Springer International Publishing: New York, NY, USA, ISBN 978-3-319-31786-1, 2016.](#)

612 Arriaga, F. J., Kornecki, T. S., Balkcom, K. S., and Raper, R. L.: A method for automating data collection from a  
613 double-ring infiltrometer under falling head conditions, *Soil Use and Management*, 26, 61-67, 10.1111/j.1475-  
614 2743.2009.00249.x, 2010.

615 Arshad, E. I., Sarki, E. A., and Khan, E. Z. A.: Analysis of Water Transmission Behaviour in Sandy Loam Soil under  
616 Different Tillage Operations of Mould Board Plough applying/Using Different Infiltration Models, *International  
617 Journal for Research in Applied Science & Engineering Technology (IJRASET)*, 3, 254-266, 2015.

618 Ayu, I. W., Soemarno, S. P., and Java, I. I.: Assessment of Infiltration Rate under Different Drylands Types in Unter-  
619 Iwes Subdistrict Sumbawa Besar, Indonesia, *Assessment*, 3, 2013.

620 Battle-Aguilar, J., Schneider, S., Pessel, M., Tucholka, P., Coquet, Y., and Vachier, P.: Axisymmetrical Infiltration in  
621 Soil Imaged by Noninvasive Electrical Resistivity, *Soil Science Society of America Journal*, 73, 510,  
622 10.2136/sssaj2007.0278, 2009.

623 Berglund, E. R., Ahyoud, A., and Tayaa, M. H.: Comparison of soil and infiltration properties of range and afforested  
624 sites in northern Morocco, *Forest Ecology and Management*, 3, 295-306, 1980.

625 Bertol, I., Barbosa, F. T., Bertol, C., and Luciano, R. V.: Water infiltration in two cultivated soils in Southern Brazil,  
626 *Revista Brasileira de Ciência do Solo*, 39, 573-588, 2015.

627 Bhardwaj, A., and Singh, R.: Development of a portable rainfall simulator infiltrometer for infiltration, runoff and  
628 erosion studies, *Agricultural water management*, 22, 235-248, 1992.

629 Bhawan, J. V.: Infiltration studies in sher-umar river doab in narmada basin, National Institute of Hydrology, Jal  
630 Vigyan bhawan, India, 1997.

631 Biro, K., Pradhan, B., Buchroithner, M., and Makeschin, F.: The Effects of Different Land Use Types on Soil  
632 Compaction and Infiltration Rate in the Drylands Vertisol of Gadarif Region, Sudan, *Tropentag: World Food System  
633 — A Contribution from Europe*, 2010.

634 Bowyer- Bower, T.: Effects of rainfall intensity and antecedent moisture on the steady- state infiltration rate in a  
635 semi- arid region, *Soil Use and Management*, 9, 69-75, 1993.

636 Campbell, G. S.: *Soil physics with BASIC: transport models for soil-plant systems*, Elsevier, 1985.

637 Casanova, M. P.: Influence of slope gradient and aspect on soil hydraulic conductivity measured with tension  
638 infiltrometer, MSc, Department of Soil Sciences Swedish University of Agricultural Sciences, Uppsala, 52 pp., 1998.

639 Chalhoub, M., Vachier, P., Coquet, Y., Darwish, T., Dever, L., and Mroueh, M.: Caractérisation des propriétés  
 640 hydrodynamiques d'un sol de la Bekaa (Liban) sur les rives du fleuve Litani, *Étude et gestion des sols*, 16, 67-84,  
 641 2009.  
 642 Chartier, M., Rostagno, C., and Pazos, G.: Effects of soil degradation on infiltration rates in grazed semiarid rangelands  
 643 of northeastern Patagonia, Argentina, *Journal of Arid Environments*, 75, 656-661, 2011.  
 644 Childs, E. C., and Collis-George, N.: The permeability of porous materials, *Proceedings of the Royal Society of*  
 645 *London A: Mathematical, Physical and Engineering Sciences*, 1950, 392-405,  
 646 Chow, V., Maidment, D., and Mays, L.: *Applied hydrology*, 572 pp, Editions McGraw-Hill, New York, 1988.  
 647 Cichota, R., Vogeler, I., Snow, V. O., and Webb, T. H.: Ensemble pedotransfer functions to derive hydraulic properties  
 648 for New Zealand soils, *Soil Research*, 51, 94, 10.1071/sr12338, 2013.  
 649 Clapp, R. B., and Hornberger, G. M.: Empirical equations for some soil hydraulic properties, *Water resources research*,  
 650 14, 601-604, 1978.  
 651 Commandeur, P. R., Wass, E. F., Forests, B. C. M. o., II., C.-B. C. P. A. o. F. R. D. F., and Service, C. F.: *Rainfall*  
 652 *Simulation, Soil Infiltration and Surface Erosion on Skidroad Surfaces*, Nelson Forest Region, Government of British  
 653 Columbia, 1994.  
 654 Coquet, Y.: *Etude in situ des phénomènes de retrait-gonflement des sols: application à deux sols tropicaux peu*  
 655 *gonflants*, 1996.  
 656 Corradini, C., Morbidelli, R., Govindaraju R. S.: *Infiltration Modeling*, Vijay P. Singh (ed), *Handbook of Applied*  
 657 *Hydrology Second Edition*, McGraw-Hill, New York, pp. 45-1; 45-9, ISBN: 9780071835091, 2017,  
 658 Coquet, Y., Vachier, P., and Labat, C.: Vertical variation of near-saturated hydraulic conductivity in three soil profiles,  
 659 *Geoderma*, 126, 181-191, 10.1016/j.geoderma.2004.09.014, 2005.  
 660 Cosby, B., Hornberger, G., Clapp, R., and Ginn, T.: A statistical exploration of the relationships of soil moisture  
 661 characteristics to the physical properties of soils, *Water resources research*, 20, 682-690, 1984.  
 662 Coutinho, A. P., Lassabatere, L., Montenegro, S., Antonino, A. C. D., Angulo- Jaramillo, R., and Cabral, J. J.:  
 663 Hydraulic characterization and hydrological behaviour of a pilot permeable pavement in an urban centre, Brazil,  
 664 *Hydrological Processes*, 30, 4242-4254, 2016.  
 665 Dasgupta, S., Mohanty, B. P., and Köhne, J. M.: Soil Hydraulic Conductivities and their Spatial and Temporal  
 666 Variations in a Vertisol, *Soil Science Society of America Journal*, 70, 1872, 10.2136/sssaj2006.0201, 2006.  
 667 Delage, P., Zadjiaoui, A., Cui, Y. J., Ghabezloo, S., Pereira, J. M., and Tang, A. M.: Numerical modelling of infiltration  
 668 profiles in the silt Tlemcen (Algeria), *E3S Web of Conferences*, 9, 11015, 10.1051/e3sconf/20160911015, 2016.  
 669 Di Prima, S., Lassabatere, L., Bagarello, V., Iovino, M., and Angulo-Jaramillo, R.: Testing a new automated single  
 670 ring infiltrometer for Beerkan infiltration experiments, *Geoderma*, 262, 20-34, 10.1016/j.geoderma.2015.08.006,  
 671 2016.  
 672 Dušek, J., Lichner, L., Vogel, T., and Štekauerová, V.: Transport of iodide in structured soil under spring barley during  
 673 irrigation experiment analyzed using dual-continuum model, *Biologia*, 68, 10.2478/s11756-013-0249-4, 2013.  
 674 Fakhre Nikche, A., Vafakhah, M., and Sadeghi, S. H. R.: Efficiency Evolution of Different Infiltration Models in  
 675 Different Land Use and Soil Classes using Rainfall Simulator, *Iranian Soil and Water Science*, 24, 183-193, 2014.

676 Fakouri, T., Emami, H., and Ghahremani, B.: Estimation of cumulative infiltration using particle size distribution in  
677 different agricultural landuses, *Journal of Water Researches in Agriculture*, 26, 379-390, 2011a.

678 Fakouri, T., Emami, H., and Ghahremani, B.: Effects of different landuses on soil water infiltration, *Journal of Water*  
679 *Researches in Agriculture*, 25, 195-206, 2011b.

680 Fan, R., Zhang, X., Yang, X., Liang, A., Jia, S., and Chen, X.: Effects of tillage management on infiltration and  
681 preferential flow in a black soil, Northeast China, *Chinese geographical science*, 23, 312-320, 2013.

682 Fodor, N., Sándor, R., Orfanus, T., Lichner, L., and Rajkai, K.: Evaluation method dependency of measured saturated  
683 hydraulic conductivity, *Geoderma*, 165, 60-68, 2011.

684 Gabriel, K. R.: The biplot graphic display of matrices with application to principal component analysis, *Biometrika*,  
685 58, 453-467, 1971.

686 Gharaibeh, M. A., Ghezzehei, T. A., Albalasmeh, A. A., and Ma'in, Z. A.: Alteration of physical and chemical  
687 characteristics of clayey soils by irrigation with treated waste water, *Geoderma*, 276, 33-40, 2016.

688 Ghavimi Panah, M. H., Sadeghi, S. H. R., and Younesi, H.: Role of superficial biochar mulch produced from dairy  
689 factory waste on infiltration and runoff in small experimental plots, *Iranian Journal of Soil and Water Research*, 48,  
690 905-916, 2017.

691 Giertz, S., Junge, B., and Diekkrüger, B.: Assessing the effects of land use change on soil physical properties and  
692 hydrological processes in the sub-humid tropical environment of West Africa, *Physics and Chemistry of the Earth*,  
693 *Parts A/B/C*, 30, 485-496, 2005.

694 Gonzalez-Sosa, E., Braud, I., Dehotin, J., Lassabatère, L., Angulo-Jaramillo, R., Lagouy, M., Branger, F.,  
695 Jacqueminet, C., Kermadi, S., and Michel, K.: Impact of land use on the hydraulic properties of the topsoil in a small  
696 French catchment, *Hydrological Processes*, n/a-n/a, 10.1002/hyp.7640, 2010.

697 Green, W. H., and Ampt, G.: Studies on Soil Physics, *The Journal of Agricultural Science*, 4, 1-24, 1911.

698 Gupta, R., Rudra, R., Dickinson, W., and Wall, G.: Spatial and seasonal variations in hydraulic conductivity in relation  
699 to four determination techniques, *Canadian Water Resources Journal*, 19, 103-113, 1994.

700 Hatzigiannakis, E., and Panoras, A.: Report of results STU, physical, -chemical and hydraulic properties of soil, *Action*  
701 *6: Assess land degradation caused by erosion in a pilot agricultural area*, 433p, 2011.

702 Haverkamp, R., Ross, P. J., Smettem, K. R. J., and Parlange, J. Y.: Three-dimensional analysis of infiltration from the  
703 disc infiltrometer: 2. Physically based infiltration equation, *Water Resources Research*, 30, 2931-2935,  
704 10.1029/94WR01788, 1994.

705 Hazbavi, Z., and Sadeghi, S.: Potential effects of vinasse as a soil amendment to control runoff and soil loss, *Soil*, 2,  
706 71, 2016.

707 Hengl, T., de Jesus, J. M., Heuvelink, G. B., Gonzalez, M. R., Kilibarda, M., Blagotić, A., ... & Guevara, M. A.:  
708 *SoilGrids250m: Global gridded soil information based on machine learning*. *PLoS one*, 12(2), e0169748, 2017.

709 Hillel, D.: Introduction to environmental soil physics, Academic press, 20032013.

710 Hopmans, J. W., Parlange, J. Y., Assouline, S.: Infiltration, Jacques W. Delleur (ed.), *The handbook of groundwater*  
711 *engineering*, CRC Press, Taylor & Francis Group, Boca Raton, New York, US.

712 Holzapfel, E. A., Mariño, M. A., Valenzuela, A., and Diaz, F.: Comparison of infiltration measuring methods for  
 713 surface irrigation, *Journal of irrigation and drainage engineering*, 114, 130-142, 1988.  
 714 Hu, X., Li, Z.-C., Li, X.-Y., and Liu, L.-y.: Quantification of soil macropores under alpine vegetation using computed  
 715 tomography in the Qinghai Lake Watershed, NE Qinghai-Tibet Plateau, *Geoderma*, 264, 244-251, 2016.  
 716 Huang, L., Zhang, P., Hu, Y., and Zhao, Y.: Vegetation succession and soil infiltration characteristics under different  
 717 aged refuse dumps at the Heidaigou opencast coal mine, *Global Ecology and Conservation*, 4, 255-263,  
 718 10.1016/j.gecco.2015.07.006, 2015.  
 719 Huang, M., Barbour, S. L., Elshorbagy, A., Zettl, J. D., and Cheng Si, B.: Infiltration and drainage processes in multi-  
 720 layered coarse soils, *Canadian Journal of Soil Science*, 91, 169-183, 2011.  
 721 Igbadun, H., Othman, M., and Ajayi, A.: Performance of Selected Water Infiltration Models in Sandy Clay Loam Soil  
 722 in Samaru Zaria, *Global Journal of Researches in Engineering: J General Engineering*, 16, 8-14, 2016.  
 723 Ilstedt, U., Malmer, A., Verbeeten, E., and Murdiyarso, D.: The effect of afforestation on water infiltration in the  
 724 tropics: a systematic review and meta-analysis. *Forest Ecology and Management*, 251(1-2), 45-51, 2007.  
 725 Jačka, L., Pavlásek, J., Pech, P., and Kuráž, V.: Assessment of evaluation methods using infiltration data measured in  
 726 heterogeneous mountain soils, *Geoderma*, 276, 74-83, 10.1016/j.geoderma.2016.04.023, 2016.  
 727 Jacques, D.: Analysis of water flow and solute transport at the field scale, PhD diss, 2000.  
 728 Jacques, D., Mohanty, B. P., and Feyen, J.: Comparison of alternative methods for deriving hydraulic properties and  
 729 scaling factors from single- disc tension infiltrometer measurements, *Water Resources Research*, 38, 2002.  
 730 Jemsi, S., Sayyad, G., Jafarnejhadi, A., and KashefiPour, S. M.: Development of infiltration rate pedotransfer  
 731 functions using artificial neural networks and multiple linear regressions for Khuzestan province in south of Iran,  
 732 *International Journal of Agriculture*, 3, 766, 2013.  
 733 Kashi, H., Emamgholizadeh, S., and Ghorbani, H.: Estimation of soil infiltration and cation exchange capacity based  
 734 on multiple regression, ANN (RBF, MLP), and ANFIS models, *Communications in soil science and plant analysis*,  
 735 45, 1195-1213, 2014.  
 736 Kavousi, S., Vafakhah, M., and Mahdian, M.: Evaluation of some infiltration models for different land uses in kojour  
 737 watershed, *Iranian of Irrigation & Water Engineering*, 4, 1-13, 2013.  
 738 Keesstra, S. D., Quinton, J. N., van der Putten, W. H., Bardgett, R. D., and Fresco, L. O.: The significance of soils and  
 739 soil science towards realization of the United Nations Sustainable Development Goals, *Soil*, 2, 111, 2016.  
 740 Khan, G. S., and Strosser, P.: Soil survey of Pakistan, 1-95, 1998.  
 741 Kheirfam, H., Sadeghi, S. H. R., Zarei Darki, B., and Homae, M.: Controlling rainfall-induced soil loss from small  
 742 experimental plots through inoculation of bacteria and cyanobacteria, *Catena*, 152, 40-46, 2017a.  
 743 Kheirfam, H., Sadeghi, S. H. R., Homae, M., and Zarei Darki, B.: Quality improvement of an erosion-prone soil  
 744 through microbial enrichment, *Soil and Tillage Research*, 165, 230-238, 2017b.  
 745 Kiani-Harchegani, M., Sadeghi, S. H. R., and Asadi, H.: Comparing grain size distribution of sediment and original  
 746 soil under raindrop detachment and raindrop-induced and flow transport mechanism, *Hydrological Sciences Journal*,  
 747 2017.

Klute, A.: Some theoretical aspects of the flow of water in unsaturated soils, *Soil Science Society of America Journal*, 16, 144-148, 1952.

Kotteck, M., Grieser, J., Beck, C., Rudolf, B., and Rubel, F.: *World map of the Köppen-Geiger climate classification updated*. *Meteorologische Zeitschrift*, 15(3), 259–263, 2006

Kutilek, M., and Krejča, M.: Three-parameter infiltration equation of Philip type, *Vodohosp. Čas*, 35, 52-61, 1987.

Lassabatere, L., Angulo-Jaramillo, R., Goutaland, D., Letellier, L., Gaudet, J., Winiarski, T., and Delolme, C.: Effect of the settlement of sediments on water infiltration in two urban infiltration basins, *Geoderma*, 156, 316-325, 2010.

Lassabatere, L., Yilmaz, D., Peyrard, X., Peyneau, P. E., Lenoir, T., Šimůnek, J., and Angulo-Jaramillo, R.: New analytical model for cumulative infiltration into dual-permeability soils, *Vadose Zone Journal*, 13, 2014.

Latorre, B., Peña, C., Lassabatere, L., Angulo-Jaramillo, R., and Moret-Fernández, D.: Estimate of soil hydraulic properties from disc infiltrometer three-dimensional infiltration curve. Numerical analysis and field application, *Journal of Hydrology*, 527, 1-12, 2015.

Li, X.-Y., Zhang, S.-Y., Peng, H.-Y., Hu, X., and Ma, Y.-J.: Soil water and temperature dynamics in shrub-encroached grasslands and climatic implications: results from Inner Mongolia steppe ecosystem of north China, *Agricultural and forest meteorology*, 171, 20-30, 2013.

Lichner, L., Eldridge, D., Schacht, K., Zhukova, N., Holko, L., Sir, M., and Pecho, J.: Grass cover influences hydrophysical parameters and heterogeneity of water flow in a sandy soil, *Pedosphere*, 21, 719-729, 2011.

Lichner, L., Hallett, P. D., Drongová, Z., Czachor, H., Kovacik, L., Mataix-Solera, J., and Homolák, M.: Algae influence the hydrophysical parameters of a sandy soil, *Catena*, 108, 58-68, 10.1016/j.catena.2012.02.016, 2013.

Lichner, L., Holko, L., Zhukova, N., Schacht, K., Rajkai, K., Fodor, N., and Sándor, R.: Plants and biological soil crust influence the hydrophysical parameters and water flow in an aeolian sandy soil/Vplyv rastlín a biologického pôdného pokryvu na hydrofyzikálne parametre a prúdenie vody v piesočnatej pôde, *Journal of Hydrology and Hydromechanics*, 60, 309-318, 2012.

Liebig, M., Tanaka, D., and Wienhold, B. J.: Tillage and cropping effects on soil quality indicators in the northern Great Plains, *Soil and Tillage Research*, 78, 131-141, 2004.

Lipiec, J., Kuś, J., Słowińska-Jurkiewicz, A., and Nosalewicz, A.: Soil porosity and water infiltration as influenced by tillage methods, *Soil and Tillage Research*, 89, 210-220, 10.1016/j.still.2005.07.012, 2006.

Ma, D., Zhang, J., Horton, R., Wang, Q., and Lai, J.: Analytical method to determine soil hydraulic properties from vertical infiltration experiments, *Soil Science Society of America Journal*, 2017.

Machiwal, D., Jha, M. K., and Mal, B.: Modelling infiltration and quantifying spatial soil variability in a wasteland of Kharagpur, India, *Biosystems Engineering*, 95, 569-582, 2006.

Machiwal, D., Dayal, D., and Kumar, S.: Estimating Water Balance of Small Reservoirs in Arid Regions: A Case Study from Kachchh, India, *Agricultural Research*, 6, 57-65, 2017.

Mallmann, M. S.: Water infiltration in soil conditioned by use of cover crops, M. Sc., Soil Science, Federal University of Santa Maria, Santa Maria, 72 pp., 2017.

Mao, L., Bralts, V. F., Pan, Y., Liu, H., and Lei, T.: Methods for measuring soil infiltration: State of the art, *International Journal of Agricultural and Biological Engineering*, 1, 22-30, 2008a.

785 Mao, L., Lei, T., Li, X., Liu, H., Huang, X., and Zhang, Y.: A linear source method for soil infiltrability measurement  
786 and model representations, *Journal of Hydrology*, 353, 49-58, 2008b.

787 Mao, L., Li, Y., Hao, W., Zhou, X., Xu, C., and Lei, T.: A new method to estimate soil water infiltration based on a  
788 modified Green–Ampt model, *Soil and Tillage Research*, 161, 31-37, 10.1016/j.still.2016.03.003, 2016.

789 Matula, S.: The influence of tillage treatments on water infiltration into soil profile, *Plant Soil and Environment*, 49,  
790 298-306, 2003.

791 McKenzie, N., Coughlan, K., and Cresswell, H.: *Soil physical measurement and interpretation for land evaluation*,  
792 Csiro Publishing, 2002.

793 Medinski, T., Mills, A., and Fey, M.: Infiltrability in soils from south-western Africa: effects of texture, electrical  
794 conductivity and exchangeable sodium percentage, *South African Journal of Plant and Soil*, 26, 157-163, 2009.

795 Mertens, J., Jacques, D., Vanderborght, J., and Feyen, J.: Characterisation of the field-saturated hydraulic conductivity  
796 on a hillslope: in situ single ring pressure infiltrometer measurements, *Journal of Hydrology*, 263, 217-229, 2002.

797 Mertens, J., Madsen, H., Feyen, L., Jacques, D., and Feyen, J.: Including prior information in the estimation of  
798 effective soil parameters in unsaturated zone modelling, *Journal of Hydrology*, 294, 251-269,  
799 10.1016/j.jhydrol.2004.02.011, 2004.

800 Mertens, J., Madsen, H., Kristensen, M., Jacques, D., and Feyen, J.: Sensitivity of soil parameters in unsaturated zone  
801 modelling and the relation between effective, laboratory and in situ estimates, *Hydrological Processes*, 19, 1611-1633,  
802 10.1002/hyp.5591, 2005.

803 Miller, K., Elliott, J., and Friday, N.: *Soils infiltration data for selected Wyoming watersheds, 1998-1999*, DTIC  
804 Document, 2005.

805 Mohammed, A. M. E., Mohamed, H. I., and Elramlawi, H. R.: Comparison of infiltration measuring techniques for  
806 furrow irrigation in cracking clay soil, *Journal of Hydrology*, 8, 0-0, 2007.

807 Mohanty, B., Kanwar, R. S., and Everts, C.: Comparison of saturated hydraulic conductivity measurement methods  
808 for a glacial-till soil, *Soil Science Society of America Journal*, 58, 672-677, 1994.

809 Morbidelli, R., Corradini, C., Saltalippi, C., Flammini, A., and Rossi, E.: Infiltration-soil moisture redistribution under  
810 natural conditions: experimental evidence as a guideline for realizing simulation models, *Hydrology and Earth System*  
811 *Sciences*, 15, 2937, 2011.

812 Morbidelli, R., Saltalippi, C., Flammini, A., Cifrodelli, M., Picciafuoco, T., Corradini, C., and Govindaraju, R. S.: In  
813 situ measurements of soil saturated hydraulic conductivity: Assessment of reliability through rainfall-runoff  
814 experiments, *Hydrological Processes*, 31, 3084-3094, 10.1002/hyp.11247, 2017.

815 Morbidelli, R., Saltalippi, C., Flammini, A., and Govindaraju, R. S.: Role of slope on infiltration: a review, *Journal of*  
816 *Hydrology*, 2018.

817 Muhamad, A., 田中正, Budi Indra, S., and Satyanto Krido, S.: Infiltration characteristics of tropical soil based on  
818 water retention data, *水文・水資源学会誌*, 21, 215-227, 2008.

819 Murray, C. D., and Buttle, J. M.: Infiltration and soil water mixing on forested and harvested slopes during spring  
820 snowmelt, Turkey Lakes Watershed, central Ontario, *Journal of Hydrology*, 306, 1-20, 10.1016/j.jhydrol.2004.08.032,  
821 2005.



822 Naeth, M., Chanasyk, D., and Bailey, A.: Applicability of the Kostiaikov equation to mixed prairie and fescue  
823 grasslands of Alberta, *Journal of range Management*, 18-21, 1991.

824 Návar, J., and Synnott, T. J.: Soil infiltration and land use in Linares, NL, Mexico, *Terra Latinoamericana*, 18, 2000.

825 Nikghalpour, M., Asadi, H., and Gorji, M.: Evaluation of spatial distribution of water infiltration rate and its relation  
826 with some physical and chemical properties in the Kuhin region, *Journal of Soil Researches (Soil and Water Science)*  
827 30, 201-213, 2016.

828 Ogbe, V., Jayeoba, O., and Ode, S.: Comparison of Four Soil Infiltration Models on A Sandy Soil in Lafia. Southern  
829 Guinea Savanna Zone of Nigeria, *Production Agriculture and Technology (PAT)*, 7, 116-126, 2011.

830 Ojha, S., Machiwal, D., and Purohit, R.: Infiltration modeling in submergence area of a water harvesting structure: a  
831 case study, *Indian Journal of Soil Conservation*, 41, 8-13, 2013.

832 Oliveira, M. B. d.: Performance analysis of infiltration equations and of methods of determination of field capacity  
833 for soils at a watershed in the São José de Ubá county (state of Rio de Janeiro, Brazil), Master of Science, Civil  
834 Engineering Program, Alberto Luiz Coimbra Institute for Postgraduate Studies and Research in Engineering, Federal  
835 University of Rio de Janeiro, COPPE/UFRJ, Rio de Janeiro, RJ, Brasil, 2005.

836 Omuto, T. C., Minasny, B., McBratney, A. B., and Biamah, E. K.: Nonlinear mixed effect modelling for improved  
837 estimation of water retention and infiltration parameters, *Journal of Hydrology*, 330, 748-758,  
838 10.1016/j.jhydrol.2006.05.006, 2006.

839 Othman, M., and Ajayi, A.: Infiltration Characteristics of Organic Amended Soils, *Global Journal of Research In*  
840 *Engineering*, 16, 2016.

841 Pachepsky, Y., and Park, Y.: Saturated hydraulic conductivity of US soils grouped according to textural class and bulk  
842 density, *Soil Science Society of America Journal*, 79, 1094-1100, 2015.

843 Pahlavan-Rad, M.R. Study on spatial variability of soil infiltration and saturated hydraulic conductivity in the lands  
844 of Sistan plain using geostatistical and random forest methods. Annual report. Sistan Agricultural and Natural  
845 Resources Research and Education Center, Zabol, Areeo Iran, 2017. Parchami-Araghi, F., Mirlatifi, S. M., Ghorbani  
846 Dashtaki, S., and Mahdian, M. H.: Point estimation of soil water infiltration process using Artificial Neural Networks  
847 for some calcareous soils, *Journal of Hydrology*, 481, 35-47, <http://doi.org/10.1016/j.jhydrol.2012.12.007>, 2013.

848 Perkins, S. R., and McDaniel, K. C.: Infiltration and Sediment Rates Following Creosotebush Control With  
849 Tebuthiuron, *Rangeland Ecology & Management*, 58, 605-613, 10.2111/05-048r1.1, 2005.

850 Philip, J.-R.: The theory of infiltration: 1. The infiltration equation and its solution, *Soil science*, 83, 345-358, 1957.

851 Poesen, J.: Soil erosion in the Anthropocene: Research needs, *Earth Surface Processes and Landforms*, 43, 64-84,  
852 2018.

853 Pulido Moncada, M., Helwig Penning, L., Timm, L. C., Gabriels, D., and Cornelis, W. M.: Visual examinations and  
854 soil physical and hydraulic properties for assessing soil structural quality of soils with contrasting textures and land  
855 uses, *Soil and Tillage Research*, 140, 20-28, 10.1016/j.still.2014.02.009, 2014.

856 Qi, D. H., and Liu, Z. Q.: Soil Infiltration Characteristics under Different Land at Western Yunnan Plateau, *Advanced*  
857 *Materials Research*, 2014, 694-697,

858 Qian, F., Cheng, D., and Liu, J.: Analysis of the Water and Soil Erosion and Infiltration Characteristic in Ziquejie  
859 Terrace, IERI Procedia, 9, 13-19, 10.1016/j.ieri.2014.09.034, 2014.

860 Quadri, M., Angulo-Jaramillo, R., Vauclin, M., Clothier, B., and Green, S.: Axisymmetric transport of water and  
861 solute underneath a disk permeameter: Experiments and numerical model, Soil Science Society of America Journal,  
862 58, 696-703, 1994.

863 Rahmati, M.: Reliable and accurate point-based prediction of cumulative infiltration using soil readily available  
864 characteristics: a comparison between GMDH, ANN, and MLR, Journal of Hydrology, On Press,  
865 <https://doi.org/10.1016/j.jhydrol.2017.05.046>, 2017.

866 Rawls, W., Yates, P., and Asmussen, L.: Calibration of selected infiltration equations for the Georgia Coastal Plain,  
867 Report ARS-S-113 July 1976. 110 p, 2 fig, 8 tab, 25 ref, 1 append., 1976.

868 Rei, I., Kazufumi, I., Yuki, I., Tatsuro, S., and Yukihiro, S.: Evaluation of Infiltration Capacity and Water Retention  
869 Potential of Amended Soil Using Bamboo Charcoal and Humus for Urban Flood Prevention, Journal of Earth Science  
870 and Engineering, 6, 10.17265/2159-581x/2016.03.002, 2016.

871 Rezaei, M., Seay, T., Seuntjens, P., Joris, I., Wesley Boënné, Van Meirvenne, M., Cornelis, W.: Predicting saturated  
872 hydraulic conductivity in a sandy grassland using proximally sensed apparent electrical conductivity, Journal of  
873 Applied Geophysics, 126, 35-41, 2016a.

874 Rezaei, M., Seuntjens, P., Shahidi, R., Joris, I., Wesley Boënné, Al-Barri, B., Cornelis, W.: The relevance of  
875 in-situ and laboratory characterization of sandy soil hydraulic properties for soil water simulations, Journal of  
876 Hydrology, 534, 251–265, 2016b.

877 Richards, L. A.: Capillary conduction of liquids through porous mediums, Journal of Applied Physics, 1, 318-333,  
878 1931.

879 Robinson, D. A., Jones, S. B., Lebron, I., Reinsch, S., Domínguez, M. T., Smith, A. R., Jones, D. L., Marshall, M. R.,  
880 and Emmett, B. A.: Experimental evidence for drought induced alternative stable states of soil moisture, Scientific  
881 reports, 6, 20018, 2016.

882 Rodrigo-Comino, J., Sinoga, J. R., González, J. S., Guerra-Merchán, A., Seeger, M., and Ries, J.: High variability of  
883 soil erosion and hydrological processes in Mediterranean hillslope vineyards (Montes de Málaga, Spain), Catena, 145,  
884 274-284, 2016.

885 Rodrigo-Comino, J., Taguas, E., Seeger, M., and Ries, J. B.: Quantification of soil and water losses in an extensive  
886 olive orchard catchment in Southern Spain, Journal of Hydrology, 556, 749-758, 2018.

887 Rubel, F., Brugger, K., Haslinger, K., and Auer, I. The climate of the European Alps: Shift of very high resolution  
888 Köppen-Geiger climate zones 1800-2100. Meteorologische Zeitschrift, 26(2), 115–125, 2017

889 Ruprecht, J., and Schofield, N.: Infiltration characteristics of a complex lateritic soil profile, Hydrological processes,  
890 7, 87-97, 1993.

891 Sadeghi, S., Hazbavi, Z., and Younesi, H.: Sustainable watershed management through applying appropriate level of  
892 soil amendments, 2nd International Conference on Sustainable Watershed Management, SUWAMA, 2014, 183-185,

893 Sadeghi, S. H. R., Moghaddam, E., and Khaleidi Darvishan, A.: Effects of subsequent rainfall events on runoff and soil  
894 erosion components from small plots treated by vinasse, Catena, 138, 1-12, 2016a.

895 Sadeghi, S. H. R., Kheirfam, H., Homaei, M., Zarei Darki, B., and Vafakhah, M.: Improving runoff behavior resulting  
896 from direct inoculation of soil micro-organisms, *Soil and Tillage Research*, 171, 35-41, 2017a.

897 Sadeghi, S. H. R., Hazbavi, Z., and Kiani-Harchegani, M.: Controllability of runoff and soil loss from small plots  
898 treated by vinasse-produced biochar, *Science of the Total Environment*, 541, 483-490, 2016b.

899 Sadeghi, S. H. R., Hazbavi, Z., Younesi, H., and Bahramifar, N.: Trade-off between runoff and sediments from treated  
900 erosion plots and polyacrylamide and acrylamide residues, *Catena*, 142, 213-220, 2016c.

901 Sadeghi, S. H. R., Kiani-Harchegani, M., and Asadi, H.: Variability of particle size distributions of upward/downward  
902 splashed materials in different rainfall intensities and slopes, *Geoderma*, 290, 100-106, 2017b.

903 Sahoo, A. K., Dirmeyer, P. A., Houser, P. R., and Kafatos, M.: A study of land surface processes using land surface  
904 models over the Little River Experimental Watershed, Georgia." *Journal of Geophysical Research: Atmospheres*  
905 113(D20), 2008

906 Saito, T., Yasuda, H., Suganuma, H., Inosako, K., Abe, Y., and Kojima, T.: Predicting Soil Infiltration and Horizon  
907 Thickness for a Large-Scale Water Balance Model in an Arid Environment, *Water*, 8, 96, 10.3390/w8030096, 2016.

908 Sándor, R., Lichner, L., Filep, T., Balog, K., Lehoczy, É., and Fodor, N.: Spatial variability of hydrophysical  
909 properties of fallow sandy soils, *Biologia*, 70, 10.1515/biolog-2015-0182, 2015.

910 Sarmadian, F., and Taghizadeh-Mehrjardi, R.: Estimation of infiltration rate and deep percolation water using feed-  
911 forward neural networks in Gorgan Province, *Eurasian Journal of Soil Science*, 3, 1, 2014.

912 Sauwa, M., Chiroma, A., Waniyo, U., Ngala, A., and Danmowa, N.: Water transmission properties of a sandy loam  
913 soil under different tillage practices in Maiduguri, Nigeria, *Agric. Biol. J. North America*, 4, 227-251, 2013.

914 Schaap, M. G., and Leij, F. J.: Database-related accuracy and uncertainty of pedotransfer functions, *Soil Science*, 163,  
915 765-779, 1998.

916 Scotter, D., Clothier, B., and Sauer, T.: A critical assessment of the role of measured hydraulic properties in the  
917 simulation of absorption, infiltration and redistribution of soil water, *Agricultural water management*, 15, 73-86, 1988.

918 Sepehrnia, N., Hajabbasi, M. A., Afyuni, M., and Lichner, L.: Extent and persistence of water repellency in two Iranian  
919 soils, *Biologia*, 71, 1137-1143, 2016.

920 Sepehrnia, N., Hajabbasi, M. A., Afyuni, M., and Lichner, L.: Soil water repellency changes with depth and  
921 relationship to physical properties within wettable and repellent soil profiles, *Journal of Hydrology and*  
922 *Hydromechanics*, 65, 99-104, 2017.

923 Sharifi Moghaddam, E., Sadeghi, S. H. R., and Khaledi Darvishan, A.: Small plot soil hydrologic components as  
924 affected by application of vinasse organic residue, *Iranian Journal of Soil and Water Research*, 45, 499-508, 2014.

925 Shirazi, M. A., and Boersma, L.: A unifying quantitative analysis of soil texture, *Soil Science Society of America*  
926 *Journal*, 48, 142-147, 1984.

927 Shukla, M., Lal, R., and Ebinger, M.: Tillage effects on physical and hydrological properties of a typic Argiaquoll in  
928 central Ohio, *Soil Science*, 168, 802-811, 2003.

929 Shukla, M., Lal, R., Ebinger, M., and Meyer, C.: Physical and chemical properties of soils under some piñon-juniper-  
930 oak canopies in a semi-arid ecosystem in New Mexico, *Journal of arid environments*, 66, 673-685, 2006.

931 Sihag, P., Tiwari, N., and Ranjan, S.: Estimation and inter-comparison of infiltration models, *Water Science*, 2017.

932 Smith, R., and Parlange, J. Y.: A parameter- efficient hydrologic infiltration model, *Water Resources Research*, 14,  
 933 533-538, 1978.  
 934 Smith, R. E., Smettem, K. R., and Broadbridge, P.: Infiltration theory for hydrologic applications, *American*  
 935 *Geophysical Union*, 2002.  
 936 Sorman, A. U., Abdulrazzak, M. J., and Ugas, M. A. S.: Application of infiltration models to field data from Wadi  
 937 Tabalah, Saudi Arabia, *Application of Tracers in Arid Zone Hydrolog*, 232, 305-316, 1995.  
 938 Su, L., Wang, Q., Shan, Y., and Zhou, B.: Estimating Soil Saturated Hydraulic Conductivity using the Kostikov and  
 939 Philip Infiltration Equations, *Soil Science Society of America Journal*, 80, 1463-1475, 2016.  
 940 Sukhanovskij, Y. P., Vytovtov, V. A., Prushchik, A. V., Solov'eva, Y. A., and Sanzharova, S. I.: Assessment of soil  
 941 infiltration capacity by using portable rainfall simulator, *Byulleten Pochvennogo instituta im. V.V. Dokuchaeva*, 78,  
 942 26-35, 2015.  
 943 Suzuki, K.: Estimation of Snowmelt Infiltration into Frozen Ground and Snowmelt Runoff in the Mogot Experimental  
 944 Watershed in East Siberia, *International Journal of Geosciences*, 04, 1346-1354, 10.4236/ijg.2013.410131, 2013.  
 945 Teague, N. F.: Near surface infiltration measurements and the implications for artificial recharge, *Masters of Science*,  
 946 *Geological Sciences*, San Diego State University, San Diego, 2010.  
 947 Teixeira, W. G., Schroth, G., Marques, J. D., and Huwe, B.: Unsaturated Soil Hydraulic Conductivity in the Central  
 948 Amazon: Field Evaluations, 283-305, 10.1007/978-3-319-06013-2\_13, 2014.  
 949 Thierfelder, C., Stahr, K., and Edgar, A. C.: Soil crusting and sealing in the Andean Hillsides of Colombia and its  
 950 impact on water infiltration, Wollny, C.; Deininger, A.; Bhandari, N.; Maass, B.; Manig, W.; Muuss, U.; Brodbeck,  
 951 F.; Howe, I.(eds.). *Technological and Institutional Innovations for Sustainable Rural Development: Deutscher*  
 952 *Tropentag 2003: International research on food security, natural resource management and rural development: Book*  
 953 *of abstracts*, Georg-August-Universität Göttingen, October 8-10, 2003., 2003.  
 954 Thierfelder, C., and Wall, P. C.: Effects of conservation agriculture techniques on infiltration and soil water content  
 955 in Zambia and Zimbabwe, *Soil and Tillage Research*, 105, 217-227, 10.1016/j.still.2009.07.007, 2009.  
 956 Thierfelder, C., Chivenge, P., Mupangwa, W., Rosenstock, T. S., Lamanna, C., and Eyre, J. X.: How climate-smart is  
 957 conservation agriculture (CA)? – its potential to deliver on adaptation, mitigation and productivity on smallholder  
 958 farms in southern Africa, *Food Security*, 9, 537-560, 10.1007/s12571-017-0665-3, 2017.  
 959 Uloma, A., Onyekachi, C., Torti, E., and Amos, U.: Infiltration characteristics of soils of some selected schools in aba,  
 960 nigeria, *Archives of Applied Science Research*, 5, 11-15, 2013.  
 961 van der Kamp, G., Hayashi, M., and Gallén, D.: Comparing the hydrology of grassed and cultivated catchments in the  
 962 semi-arid Canadian prairies, *Hydrological Processes*, 17, 559-575, 10.1002/hyp.1157, 2003.  
 963 Van Looy, K., Bouma, J., Herbst, M., Koestel, J., Minasny, B., Mishra, U., Montzka, C., Nemes, A., Pachepsky, Y.,  
 964 and Padarian, J.: Pedotransfer functions in Earth system science: challenges and perspectives, *Reviews of Geophysics*,  
 965 2017.  
 966 Vogel, T., and Cislerova, M.: A scaling-based interpretation of a field infiltration experiment, *Journal of hydrology*,  
 967 142, 337-347, 1993.

968 Vogeler, I., Cichota, R., Sivakumaran, S., Deurer, M., and McIvor, I.: Soil assessment of apple orchards under  
969 conventional and organic management, *Soil Research*, 44, 745-752, 2006.

970 Votrubova, J., Dohnal, M., Vogel, T., Tesar, M., Jelinkova, V., and Cislerova, M.: Pondered infiltration in a grid of  
971 permanent single-ring infiltrometers: Spatial versus temporal variability, *Journal of Hydrology and Hydromechanics*,  
972 65, 244-253, 2017.

973 Wang, G., Fang, Q., Wu, B., Yang, H., and Xu, Z.: Relationship between soil erodibility and modeled infiltration rate  
974 in different soils, *Journal of Hydrology*, 528, 408-418, 10.1016/j.jhydrol.2015.06.044, 2015a.

975 Wang, L., Zhong, C., Gao, P., Xi, W., and Zhang, S.: Soil Infiltration Characteristics in Agroforestry Systems and  
976 Their Relationships with the Temporal Distribution of Rainfall on the Loess Plateau in China, *PLoS One*, 10,  
977 e0124767, 10.1371/journal.pone.0124767, 2015b.

978 Wang, T., Xu, H.-l., and Bao, W.-m.: Application of isotopic information for estimating parameters in  
979 Philip infiltration model, *Water Science and Engineering*, 9, 287-292, 10.1016/j.wse.2017.01.005, 2016.

980 Waterloo, M. J., Schellekens, J., Bruijnzeel, L. A. and Rawaqa, T. T.: Changes in catchment runoff after harvesting  
981 and burning of a *Pinus caribaea* plantation in Viti Levu, Fiji, *Forest Ecology and Management* 251 (1-2): 31-44, 2007.

982 Weynants, M., Montanarella, L., Tóth, G., Arnoldussen, A., Anaya Romero, M., Bilas, G., Borresen, T., Cornelis, W.,  
983 Daroussin, J., Gonçalves, M., Haugen, L., Hennings, V., Houskova, B., Iovino, M., Javaux, M., Keay, C. A., Kätterer,  
984 T., Kvaerno, Si., Laktinova, T., Lamorski, K., Lilly, A., Makó, A., Matula, S., Morari, F., Nemes, A., Patyka, N. V.,  
985 Romano, N., Schindler, U., Shein, E., Slawinski, C., Strauss, P., Tóth, B., Wösten, H.: European HYdropedological  
986 Data Inventory (EU-HYDI). Luxembourg: Publications Office of the European Union, EUR – Scientific and Technical  
987 Research series, 2013. ~~Weynants, M., Montanarella, L., Toth, G., Arnoldussen, A., Anaya Romero, M., Bilas, G.,~~  
988 ~~Borresen, T., Cornelis, W., Daroussin, J., and Gonçalves, M. D. C.: European HYdropedological Data Inventory (EU-~~  
989 ~~HYDI), EUR Scientific and Technical Research series, 2013.~~

990 White, I., and Sully, M.J.: Macroscopic and microscopic capillary length and time scales from infiltration. *Water*  
991 *Resource Research*, 23:1514-1522, 1987.

992 Wu, G.-L., Yang, Z., Cui, Z., Liu, Y., Fang, N.-F., and Shi, Z.-H.: Mixed artificial grasslands with more roots improved  
993 mine soil infiltration capacity, *Journal of Hydrology*, 535, 54-60, 2016.

994 Yang, J.-L., and Zhang, G.-L.: Water infiltration in urban soils and its effects on the quantity and quality of runoff,  
995 *Journal of Soils and Sediments*, 11, 751-761, 10.1007/s11368-011-0356-1, 2011.

996 Yilmaz, D., Lassabatere, L., Angulo-Jaramillo, R., Deneele, D., and Legret, M.: Hydrodynamic characterization of  
997 basic oxygen furnace slag through an adapted BEST method, *Vadose Zone Journal*, 9, 107-116, 2010.

998 Zhang, J., Jiao, J., and Yang, J.: In situ rainfall infiltration studies at a hillside in Hubei Province, China, *Engineering*  
999 *Geology*, 57, 31-38, 2000.

1000 Zhang, Y., and Schaap, M. G.: Weighted recalibration of the Rosetta pedotransfer model with improved estimates of  
1001 hydraulic parameter distributions and summary statistics (Rosetta3), *Journal of Hydrology*, 547, 39-53, 2017.

1002 Zhang, Z., Lin, L., Wang, Y., and Peng, X.: Temporal change in soil macropores measured using tension infiltrometer  
1003 under different land uses and slope positions in subtropical China, *Journal of Soils and Sediments*, 16, 854-863,  
1004 10.1007/s11368-015-1295-z, 2015.

1005 Zhao, H., Zeng, Y., Lv, S., and Su, Z.: Analysis of Soil Hydraulic and Thermal Properties for Land Surface Modelling  
1006 over the Tibetan Plateau, *Earth Syst. Sci. Data Discuss.*, 2018, 1–40, 10.5194/essd-2017-122, 2018.  
1007 Zhao, H. H., Zeng, Y. Y., and Su, Z. B.: Soil Hydraulic and Thermal Properties for Land Surface Modelling over the  
1008 Tibetan Plateau, Dataset, <https://doi.org/10.4121/uuid:61db65b1-b2aa-4ada-b41e-61ef70e57e4a>, 2017.  
1009 Zhao, Y., Peth, S., Hallett, P., Wang, X., Giese, M., Gao, Y., and Horn, R.: Factors controlling the spatial patterns of  
1010 soil moisture in a grazed semi-arid steppe investigated by multivariate geostatistics, *Ecohydrology*, 4, 36–48,  
1011 10.1002/eco.121, 2011.

Table 1- References used to extract infiltration curves and metadata

| No | Dataset |      | Reference                      | No | Dataset |      | Reference                      | No | dataset |      | Reference                   |
|----|---------|------|--------------------------------|----|---------|------|--------------------------------|----|---------|------|-----------------------------|
|    | From    | To   |                                |    | From    | To   |                                |    | From    | To   |                             |
| 1  | 295     | 317  | Miller et al. (2005)           | 26 | 4516    | -    | Delage et al. (2016)           | 51 | 4692    | -    | Ayu et al. (2013)           |
| 2  | 318     | 322  | Adindu Ruth et al. (2014)      | 27 | 4517    | 4518 | Ruprecht and Schofield (1993)  | 52 | 4693    | 4699 | Rei et al. (2016)           |
| 3  | 542     | 544  | Alagna et al. (2016)           | 28 | 4519    | 4520 | Bertol et al. (2015)           | 53 | 4700    | 4702 | Omuto et al. (2006)         |
| 4  | 545     | -    | Angulo-Jaramillo et al. (2000) | 29 | 4521    | 4523 | Naeth et al. (1991)            | 54 | 4703    | 4706 | Návar and Synnott (2000)    |
| 5  | 546     | 548  | Su et al. (2016)               | 30 | 4524    | 4529 | Huang et al. (2011)            | 55 | 4707    | -    | Scotter et al. (1988)       |
| 6  | 549     | 550  | Quadri et al. (1994)           | 31 | 4530    | 4537 | van der Kamp et al. (2003)     | 56 | 4708    | 4720 | Khan and Strosser (1998)    |
| 7  | 551     | 553  | Qi and Liu (2014)              | 32 | 4538    | -    | Jačka et al. (2016)            | 57 | 4721    | 4724 | Lipiec et al. (2006)        |
| 8  | 554     | 558  | Huang et al. (2015)            | 33 | 4539    | 4568 | Matula (2003)                  | 58 | 4725    | -    | Suzuki (2013)               |
| 9  | 559     | 568  | Al-Kayssi and Mustafa (2016)   | 34 | 4569    | 4586 | Casanova (1998)                | 59 | 4726    | 4728 | Sukhanovskij et al. (2015)  |
| 10 | 1421    | 1432 | Bhardwaj and Singh (1992)      | 35 | 4587    | 4593 | Holzapfel et al. (1988)        | 60 | 4729    | 4749 | Al-Ghazal (2002)            |
| 11 | 1433    | 1435 | Berglund et al. (1980)         | 36 | 4594    | 4605 | Wang et al. (2015b)            | 61 | 4750    | -    | Sorman et al. (1995)        |
| 12 | 1436    | 1443 | Wu et al. (2016)               | 37 | 4606    | 4611 | Mao et al. (2016)              | 62 | 4751    | 4764 | Bowyer-Bower (1993)         |
| 13 | 1444    | 1446 | Chartier et al. (2011)         | 38 | 4612    | -    | Wang et al. (2016)             | 63 | 4765    | 4788 | Medinski et al. (2009)      |
| 14 | 1447    | 1456 | Sihag et al. (2017)            | 39 | 4613    | 4615 | Qian et al. (2014)             | 64 | 4789    | 4792 | Latorre et al. (2015)       |
| 15 | 1457    | 1460 | Machiwal et al. (2006)         | 40 | 4617    | 4619 | Fan et al. (2013)              | 65 | 4793    | 4795 | Biro et al. (2010)          |
| 16 | 1461    | 1466 | Igbadun et al. (2016)          | 41 | 4620    | -    | Zhang et al. (2000)            | 66 | 4796    | 4799 | Mohammed et al. (2007)      |
| 17 | 1467    | 1469 | Mohanty et al. (1994)          | 42 | 4621    | 4623 | Wang et al. (2015a)            | 67 | 4800    | 4815 | Abdallah et al. (2016)      |
| 18 | 1470    | 1472 | Sauwa et al. (2013)            | 43 | 4624    | 4633 | Yang and Zhang (2011)          | 68 | 4816    | 4819 | Murray and Buttle (2005)    |
| 19 | 1473    | 1476 | Arshad et al. (2015)           | 44 | 4634    | 4657 | Wu et al. (2016)               | 69 | 4820    | 4831 | Zhang et al. (2015)         |
| 20 | 1477    | 1488 | Bhawan (1997)                  | 45 | 4658    | 4663 | Ma et al. (2017)               | 70 | 4832    | 4837 | Perkins and McDaniel (2005) |
| 21 | 1489    | 1495 | Uloma et al. (2013)            | 46 | 4664    | 4681 | Thierfelder et al. (2003)      | 71 | 4838    | 4841 | Arriaga et al. (2010)       |
| 22 | 1496    | -    | Al-Azawi (1985)                | 47 | 4682    | 4683 | Commandeur et al. (1994)       | 72 | 4842    | 4857 | Thierfelder et al. (2017)   |
| 23 | 1497    | 1499 | Ogbe et al. (2011)             | 48 | 4684    | 4686 | Di Prima et al. (2016)         | 73 | 4858    | 4867 | Thierfelder and Wall (2009) |
| 24 | 1500    | 1507 | Teague (2010)                  | 49 | 4687    | 4688 | Angulo-Jaramillo et al. (2000) | 74 | 4868    | 4879 | Abagale et al. (2012)       |
| 25 | 4506    | 4515 | Muhamad et al. (2008)          | 50 | 4689    | 4691 | Machiwal et al. (2006)         |    |         |      |                             |



Table 2- References and correspondence for data supplied by data owners

| No. | Dataset |      | Contact person     | Email for contact             | Reference                                                                                                                                                                                         |
|-----|---------|------|--------------------|-------------------------------|---------------------------------------------------------------------------------------------------------------------------------------------------------------------------------------------------|
|     | From    | To   |                    |                               |                                                                                                                                                                                                   |
| 1   | 1       | 135  | M. Rahmati         | mehdirmti@gmail.com           | Rahmati (2017)                                                                                                                                                                                    |
| 2   | 136     | 294  | A. Farajnia        | farajnia1966@yahoo.com        | Unpublished data                                                                                                                                                                                  |
| 3   | 323     | 376  | M. Shukla          | shuklamk@nmsu.edu             | Shukla et al. (2003 & 2006)                                                                                                                                                                       |
| 4   | 377     | 426  | S. H. R. Sadeghi   | sadeghi@modares.ac.ir         | Sadeghi et al. (2014, 2016a, b, c, 2017a, b), Hazbavi and Sadeghi (2016), Kheirfam et al. (2017a, b) Sharifi Moghaddam et al. (2014); Ghavimi Panah et al. (2017); Kiani-Harchegani et al. (2017) |
| 5   | 427     | 466  | M. H. Mohammadi    | mhmohmad@ut.ac.ir             | Unpublished data                                                                                                                                                                                  |
| 6   | 467     | 505  | F. Meunier         | felicien.meunier@uclouvain.be | Unpublished data                                                                                                                                                                                  |
| 7   | 506     | 541  | N. Sepehrnia       | n.sepehrnia@gmail.com         | Sepehrnia et al. (2016 & 2017)                                                                                                                                                                    |
| 8   | 569     | 817  | D. Moret-Fernández | david@eead.csic.es            | Unpublished data                                                                                                                                                                                  |
| 9   | 818     | 940  | M. Vafakhah        | vafakhah@modares.ac.ir        | Kavousi et al. (2013); Fakher Nikche et al. (2014)                                                                                                                                                |
| 10  | 941     | 1060 | A. Cerdà           | artemio.cerda@uv.es           | Unpublished data                                                                                                                                                                                  |
| 11  | 1061    | 1079 | J. Rodrigo-Comino  | rodrigo-comino@uma.es         | Rodrigo-Comino et al. (2016); Rodrigo-Comino et al. (2018)                                                                                                                                        |
| 12  | 1080    | 1112 | H. Asadi           | ho.asadi@ut.ac.ir             | Nikghalpour et al. (2016)                                                                                                                                                                         |
| 13  | 1113    | 1119 | K. Bohne           | klaus.bohne@uni-rostock.de    | Unpublished data                                                                                                                                                                                  |
| 14  | 1120    | 1125 | L. Mao             | leoam@126.com                 | Mao et al. (2008b; 2016)                                                                                                                                                                          |
| 15  | 1126    | 1166 | L. Lichner         | lichner@uh.savba.sk           | Dušek et al. (2013), Lichner et al. (2011; 2012; 2013)                                                                                                                                            |
| 16  | 1167    | 1210 | M. V. Ottoni       | marta.ottoni@cprm.gov.br      | Oliveira (2005)                                                                                                                                                                                   |
| 17  | 1211    | 1420 | R. Sándor          | sandor.rencsi@gmail.com       | Fodor et al. (2011); Sándor et al. (2015)                                                                                                                                                         |
| 18  | 4476    | 4485 |                    |                               |                                                                                                                                                                                                   |
| 19  | 1508    | 1519 | A. Stanley         | ajayistan@gmail.com           | Igbadun et al. (2016); Othman and Ajayi (2016)                                                                                                                                                    |
| 20  | 1520    | 1521 | A. R. Vaezi        | vaezi.alireza@gmail.com       | Unpublished data                                                                                                                                                                                  |
| 21  | 1522    | 1536 | A. Albalasmeh      | aalbalasmeh@just.edu.jo       | Gharaibeh et al. (2016)                                                                                                                                                                           |
| 22  | 1537    | 1578 | D. Machiwal        | dmachiwal@rediffmail.com      | Machiwal et al. (2006, 2017) , Ojha et al. (2013)                                                                                                                                                 |
| 23  | 1579    | 1592 | H. Emami           | hemami@um.ac.ir               | Fakouri et al. (2011a, 2011b)                                                                                                                                                                     |
| 24  | 1593    | 1895 | J. Mertens         | jan.mertens@engie.com         | Mertens et al. (2002, 2004, 2005)                                                                                                                                                                 |
| 25  | 1896    | 2115 | D. Jacques         | diederik.jacques@sckcen.be    | Jacques (2000); Jacques et al. (2002)                                                                                                                                                             |
| 26  | 2116    | 2139 | J. Votrubova       | jana.votrubova@fsv.cvut.cz    | Votrubova et al. (2017)                                                                                                                                                                           |
| 27  | 2140    | 2143 | J. Battle-Aguilar  | jorbat1977@hotmail.com        | Battle-Aguilar et al. (2009)                                                                                                                                                                      |
| 28  | 2144    | 2179 | R. A. Armindo      | rarmindo@ufpr.br              | Unpublished data                                                                                                                                                                                  |
| 29  | 2180    | 2209 | S. Werner          | steffen.werner@rub.de         | Unpublished data                                                                                                                                                                                  |
| 30  | 2210    | 2255 | S. Zacharias       | steffen.zacharias@ufz.de      | Unpublished data                                                                                                                                                                                  |
| 31  | 2256    | 2281 | S. Shutaro         | sshiraki@affrc.go.jp          | Unpublished data                                                                                                                                                                                  |
| 32  | 2282    | 2304 | T. Saito           | tadaomi@muses.tottori-u.ac.jp | Saito et al. (2016)                                                                                                                                                                               |
| 33  | 2305    | 2354 | R. Taghizadeh-M.   | rh_taghizade@yahoo.com        | Unpublished data                                                                                                                                                                                  |

Table 32– References and correspondence for data supplied by data owners (Continued by Table 2)

| No. | Dataset |      | Contact person    | Email for contact                 | Reference                                                               |
|-----|---------|------|-------------------|-----------------------------------|-------------------------------------------------------------------------|
|     | From    | To   |                   |                                   |                                                                         |
| 34  | 2355    | 2356 | W. G. Teixeira    | wenceslau.teixeira@embrapa.br     | Teixeira et al. (2014)                                                  |
| 35  | 3644    | 3647 |                   |                                   |                                                                         |
| 36  | 2357    | 2436 | Y. Zhao           | yzhaosoils@gmail.com              | Zhao et al. (2011)                                                      |
| 37  | 2437    | 2475 | A. A. Moosavi     | aamousavi@gmail.com               | Unpublished data                                                        |
| 38  | 2476    | 2552 | Y. A. Pachepsky   | Yakov.Pachepsky@ars.usda.gov      | Rawls et al. (1976)                                                     |
| 39  | 2553    | 2643 | A. Panagopoulos   | panagopoulousa@gmail.com          | Hatzigiannakis and Panoras (2011)<br>+ unpublished data                 |
| 40  | 2644    | 2649 | B. Clothier       | Brent.Clothier@plantandfood.co.nz | Al Yamani et al. (2016)                                                 |
| 41  | 2650    | 2710 | C. Castellano     | ccastellanonavarro@gmail.com      | Unpublished data                                                        |
| 42  | 3507    | 3597 |                   |                                   |                                                                         |
| 43  | 2711    | 2756 | F. Becker         | fabian.becker@fu-berlin.de        | Unpublished data                                                        |
| 44  | 2757    | 2765 | I. Vogeler        | iris.vogeler@plantandfood.co.nz   | Vogeler et al. (2006); Cichota et al. (2013)                            |
| 45  | 2766    | 2788 | R. Morbidelli     | renato.morbidelli@unipg.it        | Morbidelli et al. (2017)                                                |
| 46  | 2789    | 2832 | S. Giertz         | sgiertz@uni-bonn.de               | Giertz et al. (2005)                                                    |
| 47  | 2833    | 2868 | T. Vogel          | vogel@fsv.cvut.cz                 | Vogel and Cislerova (1993)                                              |
| 48  | 2869    | 2948 | W. Cornelis       | Wim.Cornelis@ugent.be             | Pulido Moncada et al. (2014);<br>Rezaei et al. (2016a, b)               |
| 49  | 2949    | 3386 | Y. Coquet         | yves.coquet@univ-orleans.fr       | Coquet (1996); Coquet et al. (2005); Chalhoub et al. (2009)             |
| 50  | 3705    | 3709 |                   |                                   |                                                                         |
| 51  | 3387    | 3506 | B. Mohanty        | bmohanty@tamu.edu                 | Dasgupta et al. (2006)                                                  |
| 52  | 3598    | 3643 | D. J. Reinert     | dalvan@ufsm.br                    | Mallmann (2017)                                                         |
| 53  | 3648    | 3657 | M.R. Pahlavan Rad | pahlavanrad@gmail.com             | Pahlavan-Rad (2017)                                                     |
| 54  | 3658    | 3680 | T. Saito          | tadaomi@muses.tottori-u.ac.jp     | Unpublished data                                                        |
| 55  | 3681    | 3704 | X. Li             | xyli@bnu.edu.cn                   | Li et al. (2013); Hu et al. (2016)                                      |
| 56  | 4497    | 4505 |                   |                                   |                                                                         |
| 57  | 3710    | 3745 | Y. Bamutaze       | yazidhibamutaze@gmail.com         | Unpublished data                                                        |
| 58  | 3746    | 3833 | I. Braud          | isabelle.braud@irstea.fr          | Gonzalez-Sosa et al. (2010); Braud (2015); Braud and Vandervaere (2015) |
| 59  | 3907    | 4011 |                   |                                   |                                                                         |
| 60  | 3834    | 3874 | M. R. Mosaddeghi  | mosaddeghi@yahoo.com              | Unpublished data                                                        |
| 61  | 3875    | 3906 | S. B. Mousavi     | b_mosavi2000@yahoo.com            | Unpublished data                                                        |
| 62  | 4012    | 4026 | M. Pulido         | manpufer@hotmail.com              | Unpublished data                                                        |
| 63  | 4027    | 4457 | F. P. Roberts     | frapar@ceh.ac.uk                  | Unpublished data                                                        |
|     | 4458    | 4475 |                   |                                   |                                                                         |
| 64  | 4486    | 4496 | T. Picciafuoco    | picciafuoco@hydro.tuwien.ac.at    | Robinson et al. (2016, 2017)                                            |
| 65  | 4880    | 4886 | M. A. Liebig      | mark.liebig@ars.usda.gov          | Morbidelli et al. (2017)                                                |
| 66  | 4887    | 4936 | Y. Zeng           | y.zeng@utwente.nl                 | Liebig et al. (2004)                                                    |
| 67  | 4937    | 5018 | L. Lassabatere    | laurent.lassabatere@entpe.fr      | Zhao et al. (2017, 2018)                                                |
| 68  | 5019    | 5023 | I. Eskandari      | eskandari1343@yahoo.com           | Lassabatere et al. (2010); Yilmaz et al. (2010); Coutinho et al. (2016) |
|     |         |      |                   |                                   | Unpublished data                                                        |

Table 34- Description of the variables listed in database

| Column                    | Supplies:                                                                                                                                                                                                                                                                                                                                              | Dimension                          |
|---------------------------|--------------------------------------------------------------------------------------------------------------------------------------------------------------------------------------------------------------------------------------------------------------------------------------------------------------------------------------------------------|------------------------------------|
| <i>Code</i>               | Data set identifier with 4 digits from 0001 to 5023                                                                                                                                                                                                                                                                                                    |                                    |
| <i>Clay</i>               | Mass of soil particles, < 0.002 mm                                                                                                                                                                                                                                                                                                                     | %                                  |
| <i>Silt</i>               | Mass of soil particles, >0.002 and < 0.05 mm                                                                                                                                                                                                                                                                                                           | %                                  |
| <i>Sand</i>               | Mass of soil particle, > 0.05 and < 2 mm                                                                                                                                                                                                                                                                                                               | %                                  |
| <i>Texture</i>            | 1: Sand; 2: Loamy sand; 3: Sandy loam; 4: Sandy clay loam; 5: Sandy Clay; 6: Loam; 7: Silt loam; 8: Silt; 9: Clay loam; 10: Silty clay loam; 11: Silty clay; 12: Clay                                                                                                                                                                                  |                                    |
| <i>Gravel</i>             | Mass of particles larger than 2 mm                                                                                                                                                                                                                                                                                                                     | %                                  |
| <i>dg</i>                 | Geometric mean diameter                                                                                                                                                                                                                                                                                                                                | mm                                 |
| <i>Sg</i>                 | Standard deviation of soil particle diameter                                                                                                                                                                                                                                                                                                           |                                    |
| <i>OC</i>                 | Soil organic carbon content                                                                                                                                                                                                                                                                                                                            | %                                  |
| <i>Db</i>                 | Soil bulk density                                                                                                                                                                                                                                                                                                                                      | g cm <sup>-3</sup>                 |
| <i>Dp</i>                 | Soil particle density                                                                                                                                                                                                                                                                                                                                  | g cm <sup>-3</sup>                 |
| <i>Ksat</i>               | Soil saturated hydraulic conductivity                                                                                                                                                                                                                                                                                                                  | cm h <sup>-1</sup>                 |
| <i>Theta_sat</i>          | Saturated volumetric soil water content                                                                                                                                                                                                                                                                                                                | cm <sup>3</sup> cm <sup>-3</sup>   |
| <i>Theta_i</i>            | Initial volumetric soil water content                                                                                                                                                                                                                                                                                                                  | cm <sup>3</sup> cm <sup>-3</sup>   |
| <i>FC</i>                 | Soil water content at field capacity                                                                                                                                                                                                                                                                                                                   | cm <sup>3</sup> cm <sup>-3</sup>   |
| <i>PWP</i>                | Soil water content at permanent wilting point (1500 kPa)                                                                                                                                                                                                                                                                                               | cm <sup>3</sup> cm <sup>-3</sup>   |
| <i>Theta_r</i>            | Residual volumetric soil water content                                                                                                                                                                                                                                                                                                                 | cm <sup>3</sup> cm <sup>-3</sup>   |
| <i>WAS</i>                | Wet-aggregate stability                                                                                                                                                                                                                                                                                                                                | %                                  |
| <i>MWD</i>                | Aggregates mean weight diameter                                                                                                                                                                                                                                                                                                                        | mm                                 |
| <i>GMD</i>                | Aggregates geometric mean diameter                                                                                                                                                                                                                                                                                                                     | mm                                 |
| <i>EC</i>                 | Soil electrical conductivity                                                                                                                                                                                                                                                                                                                           | dS m <sup>-1</sup>                 |
| <i>pH</i>                 | Soil acidity                                                                                                                                                                                                                                                                                                                                           | -                                  |
| <i>Gypsum</i>             | Soil gypsum content                                                                                                                                                                                                                                                                                                                                    | %                                  |
| <i>CCE</i>                | Soil <del>calcium</del> carbonate calcium equivalent                                                                                                                                                                                                                                                                                                   | %                                  |
| <i>CEC</i>                | Soil cation exchange capacity                                                                                                                                                                                                                                                                                                                          | Cmol <sub>c</sub> kg <sup>-1</sup> |
| <i>SAR</i>                | Soil sodium adsorption ratio                                                                                                                                                                                                                                                                                                                           | -                                  |
| <i>DiscRadius</i>         | Applied disc radius (if any)                                                                                                                                                                                                                                                                                                                           | mm                                 |
| <i>Instrument</i>         | Applied instruments for infiltration measurement:<br>1: Double ring; 2: Single ring; 3: Rainfall simulator; 4: Guelph permeameter; 5: Disc infiltrometer; 6: Micro-infiltrometer; 7: Mini-infiltrometer; 8: Aardvark Permeameter; 9: Linear source method; 10: Point source method; 11: Hood infiltrometer; 12: Tension infiltrometer; 13: BEST method |                                    |
| <i>Vegetation cover</i>   |                                                                                                                                                                                                                                                                                                                                                        | %                                  |
| <i>Land use</i>           | Dominant land-use or land cover type of the experimental site                                                                                                                                                                                                                                                                                          |                                    |
| <i>Rainfall intensity</i> | Simulated rain intensity                                                                                                                                                                                                                                                                                                                               | mm h <sup>-1</sup>                 |
| <i>Slope</i>              | The mean slope of the soil surface                                                                                                                                                                                                                                                                                                                     | %                                  |
| <i>Treatment</i>          | Applied treatment in experimental site                                                                                                                                                                                                                                                                                                                 |                                    |
| <i>Crust</i>              | Yes: existence of crust; No: no crust layer                                                                                                                                                                                                                                                                                                            |                                    |
| <i>Sand contact layer</i> | Yes: sand contact layer is applied during infiltration measurement; No: no sand contact layer                                                                                                                                                                                                                                                          |                                    |

1019

Table 45- Countries and the number of data sources (n) contributing to the database

| Country        | n  | Country      | n | Country    | n |
|----------------|----|--------------|---|------------|---|
| Iran           | 38 | Austria      | 2 | Indonesia  | 1 |
| China          | 23 | Chile        | 2 | Iraq       | 1 |
| USA            | 15 | Ghana        | 2 | Japan      | 1 |
| Brazil         | 9  | Morocco      | 2 | Jordan     | 1 |
| Spain          | 9  | Namibia      | 2 | Kenya      | 1 |
| France         | 9  | New Zealand  | 2 | Lebanon    | 1 |
| Germany        | 8  | Pakistan     | 2 | Malawi     | 1 |
| India          | 8  | Russia       | 2 | Mexico     | 1 |
| Canada         | 7  | Senegal      | 2 | Mozambique | 1 |
| United Kingdom | 7  | Slovakia     | 2 | Myanmar    | 1 |
| Hungary        | 6  | South Africa | 2 | Netherland | 1 |
| Nigeria        | 6  | Sudan        | 2 | Poland     | 1 |
| Greece         | 5  | Zambia       | 2 | Scotland   | 1 |
| Belgium        | 4  | Argentina    | 1 | Tanzania   | 1 |
| Italy          | 4  | Australia    | 1 | Telangana  | 1 |
| Czech Republic | 3  | Benin        | 1 | UAE        | 1 |
| Saudi Arabia   | 3  | Cameroon     | 1 | Uganda     | 1 |
| Australia      | 2  | Colombia     | 1 | Zimbabwe   | 1 |

1020

1021      Table 56- Number of soils in each soil USDA textural class for which infiltration data are included in the database.

| Group                                 | Soil texture class | Availability |
|---------------------------------------|--------------------|--------------|
| Coarse-textured soils                 |                    | 1092         |
|                                       | Sand               | 291          |
|                                       | Loamy sand         | 111          |
|                                       | Sandy loam         | 690          |
| Medium-textured soils                 |                    | 1238         |
|                                       | Loam               | 716          |
|                                       | Silt loam          | 522          |
|                                       | Silt               | 0            |
| Fine to moderately fine-textured soil |                    | 1476         |
|                                       | Clay loam          | 514          |
|                                       | Clay               | 352          |
|                                       | Silty clay loam    | 253          |
|                                       | Sandy clay loam    | 226          |
|                                       | Silty clay         | 131          |
|                                       | Sandy clay         | 0            |

1022  
1023

1024 Table 67- Soil properties, number of data entries in the database (out of 5023 soil water infiltration curves in total),  
1025 and their statistical description

| Soil properties                                                  | Availability | Fr (%) | Mean | Min   | Max  | Median | CV (%) |
|------------------------------------------------------------------|--------------|--------|------|-------|------|--------|--------|
| Clay (%)                                                         | 3842         | 76     | 24   | 0     | 80   | 20     | 64     |
| Silt (%)                                                         | 3842         | 76     | 36   | 0     | 82   | 37     | 52     |
| Sand (%)                                                         | 3842         | 76     | 41   | 1     | 100  | 38     | 63     |
| Bulk density (g cm <sup>-3</sup> )                               | 3295         | 66     | 1.32 | 0.14  | 2.81 | 1.35   | 20     |
| Organic carbon (%)                                               | 3102         | 62     | 3    | 0     | 88   | 1      | 200    |
| Saturated hydraulic cond. (cm h <sup>-1</sup> )                  | 1895         | 38     | 41   | 0     | 3004 | 3      | 426    |
| Initial soil water content (cm <sup>3</sup> cm <sup>-3</sup> )   | 1569         | 31     | 0.17 | 0     | 0.63 | 0.14   | 68     |
| Saturated soil water content (cm <sup>3</sup> cm <sup>-3</sup> ) | 1400         | 28     | 0.44 | 0.01  | 0.87 | 0.45   | 24     |
| Carbonate calcium equivalent (%)                                 | 1399         | 28     | 14   | 0     | 56   | 8      | 101    |
| Electrical conductivity (dS m <sup>-1</sup> )                    | 1113         | 22     | 25   | 0     | 358  | 1      | 249    |
| pH                                                               | 1081         | 22     | 7.4  | 4.7   | 8.6  | 7.6    | 12     |
| Particle density (g cm <sup>-3</sup> )                           | 438          | 9      | 2.52 | 1.73  | 2.97 | 2.56   | 9      |
| Gypsum (%)                                                       | 380          | 8      | 4    | 0     | 49   | 3      | 137    |
| Cation exchange capacity (cmol <sub>c</sub> kg <sup>-1</sup> )   | 357          | 7      | 17   | 3     | 26   | 18     | 21     |
| Wet-aggregate stability (%)                                      | 309          | 6      | 61   | 5     | 96   | 63     | 37     |
| Residual soil water content (cm <sup>3</sup> cm <sup>-3</sup> )  | 263          | 5      | 0.10 | 0.001 | 0.38 | 0.06   | 86     |
| Mean weight diameter (mm)                                        | 258          | 5      | 1    | 0.10  | 2.75 | 1.0    | 54     |
| Gravel (%)                                                       | 243          | 5      | 18   | 0     | 92   | 15     | 84     |
| Sodium adsorption ratio                                          | 156          | 3      | 5    | 0     | 89   | 1      | 351    |
| Soil water content at FC (cm <sup>3</sup> cm <sup>-3</sup> )     | 74           | 1      | 0.28 | 0.12  | 0.54 | 0.27   | 34     |
| Soil water content at PWP (cm <sup>3</sup> cm <sup>-3</sup> )    | 64           | 1      | 0.18 | 0.05  | 0.36 | 0.20   | 47     |
| Geometric mean diameter (mm)                                     | 73           | 1      | 0.6  | 0.4   | 0.8  | 0.6    | 18     |

1026 Fr: Frequency (%), Min: Minimum, Max: Maximum, CV: coefficient of variation.

1027

Table 78- Instruments used to measure soil infiltration curves

| Instrument/method used |                | Infiltration curves |
|------------------------|----------------|---------------------|
| Ring                   | Double ring    | 828                 |
|                        | Single ring    | 570                 |
|                        | Beerkan (BEST) | 197                 |
| Overall                |                | 1595                |
| Infiltrometer          | Disc           | 607                 |
|                        | Mini-disc      | 1140                |
|                        | Micro-disc     | 36                  |
|                        | Hood           | 23                  |
|                        | Tension        | 752                 |
| Overall                |                | 2558                |
| Permeameter            | Guelph         | 181                 |
|                        | Aardvark       | 50                  |
| Overall                |                | 231                 |
| Rainfall simulator     |                | 374                 |
| Linear source method   |                | 10                  |
| Point source method    |                | 4                   |
| Not reported           |                | 251                 |
| Sum                    |                | 5023                |

1028



1029

Table 89- Number of infiltration curves with a given land use types

| Land use        | n    | Land use        | n    |
|-----------------|------|-----------------|------|
| Agriculture     | 2019 | Vineyards       | 22   |
| Grassland       | 821  | Upland          | 11   |
| Pasture         | 229  | Pure Sand       | 10   |
| Forest          | 204  | Brushwood       | 6    |
| Garden          | 152  | Road            | 5    |
| Bare            | 99   | Agro-pastoral   | 4    |
| Urban Soils     | 82   | Park            | 3    |
| Savanna         | 41   | Salt-marsh soil | 3    |
| Abandoned farms | 39   | Afforestation   | 2    |
| Idle            | 32   | Campus          | 2    |
| Shrub           | 30   | Residential     | 2    |
| Available       | 3818 | Unknown         | 1205 |

1030

1031

| Table 9-10 Accuracy analysis of empirical models fitted to experimental data of infiltration |      |                |       |     |       |           |         |       |      |                       |                       |
|----------------------------------------------------------------------------------------------|------|----------------|-------|-----|-------|-----------|---------|-------|------|-----------------------|-----------------------|
| Infiltration type                                                                            | n    | R <sup>2</sup> |       |     |       | RMSE (cm) |         |       |      | R <sup>2</sup> > 0.90 | R <sup>2</sup> > 0.99 |
|                                                                                              |      | Mean           | Min   | Max | STD   | Mean      | Min     | Max   | STD  | 801                   | 640                   |
| 1D                                                                                           | 828  | 0.985          | 0.529 | 1   | 0.049 | 0.900     | 1.3e-4  | 69.30 | 3.31 |                       |                       |
| 3D                                                                                           | 3350 | 0.975          | 0.032 | 1   | 0.066 | 0.449     | 5.5e-12 | 98.95 | 2.95 |                       |                       |
| All                                                                                          | 4178 | 0.977          | 0.032 | 1   | 0.063 | 0.538     | 5.5e-12 | 98.95 | 3.03 |                       |                       |

1032

STD: standard deviation

1033

Table 104- Estimated or measured average values of infiltration parameters for different textural classes extracted from the current database

| Texture class   | Estimated by Eq. (8) or (9) |                            |        |      |                                 |               |        | Measured       |                                 |        |       | Independent T test between measured and estimated $K_{sat}$ |                    |
|-----------------|-----------------------------|----------------------------|--------|------|---------------------------------|---------------|--------|----------------|---------------------------------|--------|-------|-------------------------------------------------------------|--------------------|
|                 | n <sup>§</sup>              | $S$ (cm h <sup>0.5</sup> ) |        |      | $K_{sat}$ (cm h <sup>-1</sup> ) |               |        | n <sup>§</sup> | $K_{sat}$ (cm h <sup>-1</sup> ) |        |       |                                                             |                    |
|                 |                             | Mean                       | Median | STD  | <i>Mean</i>                     | <i>Median</i> | STD    |                | Mean                            | Median | STD   | df                                                          | T value            |
| Sand            | 291                         | 2.3                        | 0.26   | 4.3  | 42.2                            | 15            | 134.5  | 229            | 43.6                            | 24     | 149   | 518                                                         | 0.10 <sup>ns</sup> |
| Loamy sand      | 92                          | 10.6                       | 5.7    | 17.5 | 61.4                            | 10            | 173.2  | 63             | 24.6                            | 8.2    | 72    | 153                                                         | 1.59 <sup>ns</sup> |
| Sandy loam      | 500                         | 9.2                        | 2.95   | 15.7 | 32                              | 3.1           | 94.5   | 424            | 41.2                            | 5.7    | 166   | 922                                                         | 1.05 <sup>ns</sup> |
| Silt loam       | 409                         | 9.4                        | 1.5    | 19.1 | 26.5                            | 1.7           | 61.7   | 165            | 2.9                             | 0.96   | 5.1   | 572                                                         | 4.90 <sup>**</sup> |
| Loam            | 583                         | 7.9                        | 2.4    | 12.9 | 7.8                             | 0.28          | 26.7   | 270            | 4.9                             | 1.18   | 13.7  | 851                                                         | 1.69 <sup>ns</sup> |
| Sandy clay loam | 185                         | 5.9                        | 2.1    | 8.6  | 7.4                             | 1.4           | 12.8   | 84             | 5.4                             | 2.24   | 6.9   | 267                                                         | 1.35 <sup>ns</sup> |
| Silty clay loam | 250                         | 3.2                        | 0.64   | 12.5 | 10.6                            | 1.7           | 24.1   | 64             | 12.3                            | 2.42   | 63.2  | 312                                                         | 0.32 <sup>ns</sup> |
| Clay loam       | 467                         | 6.8                        | 2.1    | 13.6 | 8.3                             | 2.3           | 20     | 166            | 7.6                             | 2.97   | 21.3  | 631                                                         | 0.38 <sup>ns</sup> |
| Sandy clay      | -                           | -                          | -      | -    | -                               | -             | -      | -              | -                               | -      | -     | -                                                           | -                  |
| Silty clay      | 121                         | 7.7                        | 2.2    | 13.4 | 26.2                            | 7.8           | 61.5   | 54             | 44.8                            | 6.97   | 88.2  | 173                                                         | 1.59 <sup>ns</sup> |
| Clay            | 333                         | 14.6                       | 1.7    | 39.5 | 354.3                           | 1.3           | 1268.5 | 79             | 148.8                           | 2.94   | 458.4 | 410                                                         | 1.42 <sup>ns</sup> |
| Silt            | -                           | -                          | -      | -    | -                               | -             | -      | -              | -                               | -      | -     | -                                                           | -                  |
| Total           | 4179                        | 8.5                        | 2.6    | 18.2 | 46                              | 1.8           | 374.8  | 1895           | 41                              | 3.4    | 174   | -                                                           | -                  |

§: the number soils included in calculation

ns: insignificant and \*\*: significant at 1 % probability level

STD: standard deviation

1034  
1035  
1036  
1037

Table 11-2. Comparison of the estimated  $K_{sat}$  values from current database (SWIG) with measured  $K_{sat}$  values presented in literature

| Texture class   | Data source | Clapp and Hornberger (1978) | Rosetta3 (Zhang and Schaap, 2017)         | Cosby et al. (1984)                     | Rawls database (Schaap and Leij, 1998)    | Ahuja database (Schaap and Leij, 1998)    | UNSODA database (Schaap and Leij, 1998)   | US soils $K_{sat}$ data (Pachepsky and Park, 2015) | EU-HYDI database (Weynants et al., 2013)  |
|-----------------|-------------|-----------------------------|-------------------------------------------|-----------------------------------------|-------------------------------------------|-------------------------------------------|-------------------------------------------|----------------------------------------------------|-------------------------------------------|
|                 |             | $K_{sat}$                   | $\log K_{sat}/STD$                        | $\log K_{sat}/STD$                      | $\log K_{sat}/STD$                        | $\log K_{sat}/STD$                        | $\log K_{sat}/STD$                        | $\log K_{sat}/STD$                                 | $\log K_{sat}/STD$                        |
|                 |             | (cm min <sup>-1</sup> )     | (log <sub>10</sub> cm day <sup>-1</sup> ) | (log <sub>10</sub> in h <sup>-1</sup> ) | (log <sub>10</sub> cm day <sup>-1</sup> ) | (log <sub>10</sub> cm day <sup>-1</sup> ) | (log <sub>10</sub> cm day <sup>-1</sup> ) | (log <sub>10</sub> cm h <sup>-1</sup> )            | (log <sub>10</sub> cm day <sup>-1</sup> ) |
| Sand            | Literature  | 1.056                       | 2.81/0.59 (253)                           | 0.82/0.39                               | 2.71/0.51 (97)                            | 3.01/0.45 (82)                            | 2.70/0.74 (129)                           | 1.57/0.71 (115)                                    | 0.71/1.45 (264)                           |
|                 | SWIG        | 0.704                       | 3.01 /3.51 (291)                          | 1.22 /1.73                              | 3.01 /3.51 (291)                          | 3.01 /3.51 (291)                          | 3.01 /3.51 (291)                          | 1.63 /2.13 (291)                                   | 3.01 /3.51 (291)                          |
| Loamy sand      | Literature  | 0.938                       | 2.02/0.64 (167)                           | 0.30/0.51                               | 1.91/0.61 (135)                           | 2.09/0.69 (19)                            | 2.36/0.59 (51)                            | 1.03/0.42 (76)                                     | 0.80/1.41 (234)                           |
|                 | SWIG        | 1.033                       | 3.17 /3.63 (92)                           | 1.39 /1.84                              | 3.17 /3.63 (92)                           | 3.17 /3.63 (92)                           | 3.17 /3.63 (92)                           | 1.79 /2.25 (92)                                    | 3.17 /3.63 (92)                           |
| Sandy loam      | Literature  | 0.208                       | 1.58/0.67 (315)                           | -0.13/0.67                              | 1.53/0.65 (337)                           | 1.73/0.64 (65)                            | 1.58/0.92 (79)                            | 0.66/0.54 (169)                                    | 1.17/1.34 (825)                           |
|                 | SWIG        | 0.534                       | 2.89 /3.36 (500)                          | 1.10 /1.58                              | 2.89 /3.36 (500)                          | 2.89 /3.36 (500)                          | 2.89 /3.36 (500)                          | 1.51 /1.98 (500)                                   | 2.89 /3.36 (500)                          |
| Silt loam       | Literature  | 0.043                       | 1.28/0.74 (130)                           | -0.4/0.55                               | 1.04/0.54 (217)                           | 1.24/0.47 (12)                            | 1.48/0.86 (103)                           | 0.11/0.87 (215)                                    | 0.89/1.45 (714)                           |
|                 | SWIG        | 0.442                       | 2.80 /3.17 (409)                          | 1.02 /1.39                              | 2.80 /3.17 (409)                          | 2.80 /3.17 (409)                          | 2.80 /3.17 (409)                          | 1.42 /1.79 (409)                                   | 2.80 /3.17 (409)                          |
| Loam            | Literature  | 0.042                       | 1.09/0.92 (117)                           | -0.32/0.63                              | 0.99/0.63 (137)                           | 0.83/0.95 (50)                            | 1.58/0.92 (62)                            | 0.12/0.79 (81)                                     | 1.69/1.76 (411)                           |
|                 | SWIG        | 0.129                       | 2.27 /2.81 (583)                          | 0.49 /1.02                              | 2.27 /2.81 (583)                          | 2.27 /2.81 (583)                          | 2.27 /2.81 (583)                          | 0.89 /1.43 (583)                                   | 2.27 /2.81 (583)                          |
| Sandy clay loam | Literature  | 0.038                       | 1.14/0.85 (13)                            | -0.2/0.54                               | 1.29/0.71 (104)                           | 0.81/0.80 (36)                            | 0.99/1.21 (41)                            | 0.12/0.94 (139)                                    | 0.73/1.45 (128)                           |
|                 | SWIG        | 0.124                       | 2.25 /2.49 (185)                          | 0.47 /0.70                              | 2.25 /2.49 (185)                          | 2.25 /2.49 (185)                          | 2.25 /2.49 (185)                          | 0.87 /1.11 (185)                                   | 2.25 /2.49 (185)                          |
| Silty clay loam | Literature  | 0.010                       | 1.04/0.74 (46)                            | -0.54/0.61                              | 0.87/0.55 (47)                            | 1.09/0.78 (21)                            | 1.14/0.85 (21)                            | -0.15/0.75 (83)                                    | 0.35/1.50 (364)                           |
|                 | SWIG        | 0.178                       | 2.41 /2.77 (250)                          | 0.62 /0.98                              | 2.41 /2.77 (250)                          | 2.41 /2.77 (250)                          | 2.41 /2.77 (250)                          | 1.03 /1.39 (250)                                   | 2.41 /2.77 (250)                          |
| Clay loam       | Literature  | 0.015                       | 0.87/1.11 (58)                            | -0.46/0.59                              | 0.67/0.58 (77)                            | 0.79/1.08 (48)                            | 1.84/0.89 (25)                            | -0.03/0.94 (109)                                   | 1.10/1.54 (284)                           |
|                 | SWIG        | 0.139                       | 2.30 /2.68 (467)                          | 0.52 /0.90                              | 2.30 /2.68 (467)                          | 2.30 /2.68 (467)                          | 2.30 /2.68 (467)                          | 0.92 /1.3 (467)                                    | 2.30 /2.68 (467)                          |
| Sandy clay      | Literature  | 0.013                       | 1.06/0.89 (10)                            | 0.01/0.33                               | 1.33/0.33 (9)                             | -0.03/1.28 (2)                            | - (-)                                     | -0.77/1.22 (21)                                    | 0.81/1.56 (5)                             |
|                 | SWIG        | -                           | - /- (-)                                  | -/-                                     | - /- (-)                                  | - /- (-)                                  | - /- (-)                                  | - /- (-)                                           | - /- (-)                                  |
| Silty clay      | Literature  | 0.006                       | 0.98/0.58 (14)                            | -0.72/0.69                              | 0.82/0.55 (12)                            | 1.15/0.16 (5)                             | 0.92/0.71 (12)                            | -0.72/0.95 (22)                                    | 0.18/1.32 (349)                           |
|                 | SWIG        | 0.439                       | 2.80 /3.17 (121)                          | 1.02 /1.39                              | 2.80 /3.17 (121)                          | 2.80 /3.17 (121)                          | 2.80 /3.17 (121)                          | 1.42 /1.79 (121)                                   | 2.80 /3.17 (121)                          |
| Clay            | Literature  | 0.008                       | 1.17/0.92 (60)                            | -                                       | 0.94/0.31 (34)                            | 1.03/0.83 (31)                            | 1.41/0.15 (27)                            | -0.17/0.71 (115)                                   | -0.08/1.41 (737)                          |
|                 | SWIG        | 5.906                       | 3.93 /4.48 (333)                          | 2.15 /2.70                              | 3.93 /4.48 (333)                          | 3.93 /4.48 (333)                          | 3.93 /4.48 (333)                          | 2.55 /3.10 (333)                                   | 3.93 /4.48 (333)                          |
| Silt            | Literature  | -                           | 1.64/0.27 (3)                             | -                                       | 1.43/- (3)                                | - (-)                                     | 1.75/0.20 (3)                             | - (-)                                              | -0.29/1.56 (11)                           |
|                 | SWIG        | -                           | -/- (-)                                   | -/-                                     | -/- (-)                                   | -/- (-)                                   | -/- (-)                                   | -/- (-)                                            | -/- (-)                                   |

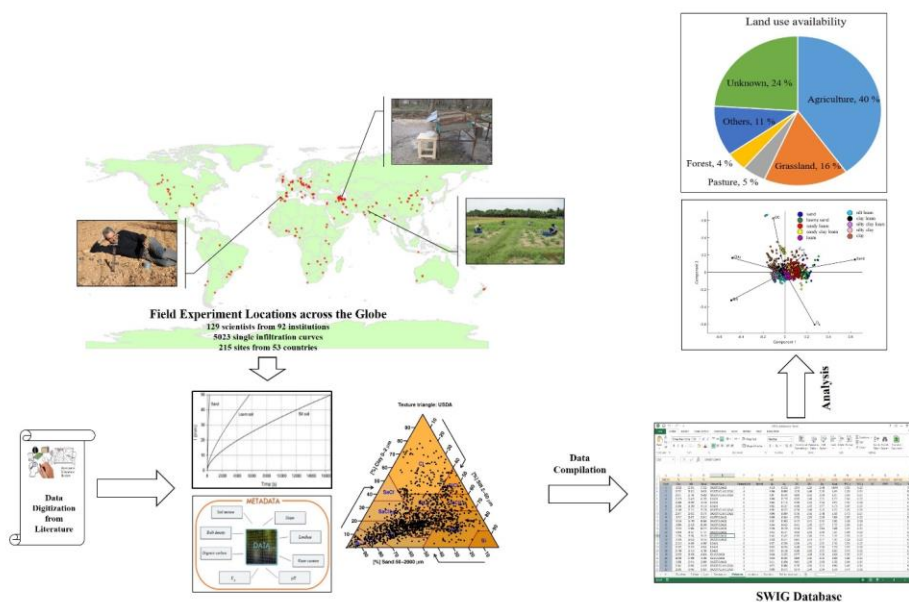

Figure 1- Graphical Abstract

**Formatted:** Font: (Default) Times New Roman, 10 pt,  
Complex Script Font: Times New Roman, 10 pt

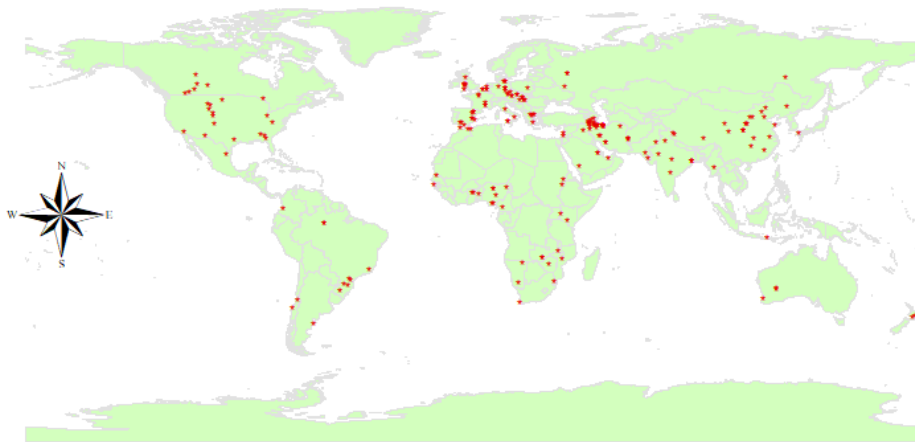

Figure 2- Global distribution of infiltration measuring sites that were included in the database

**Formatted:** Font: (Default) Times New Roman, 10 pt,  
Complex Script Font: Times New Roman, 10 pt

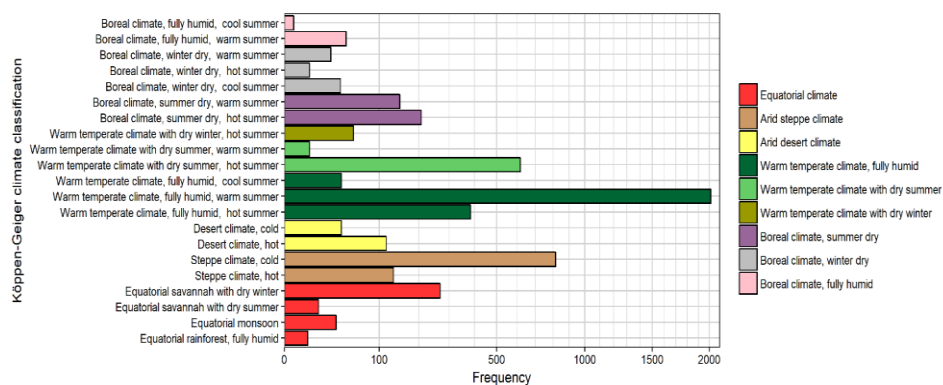

Figure 3- Number of samples by Köppen-Geiger climatic zones (Rubel et al., 2017; Kottek et al., 2006)

**Formatted:** Font: (Default) Times New Roman, 10 pt,  
Complex Script Font: Times New Roman, 10 pt

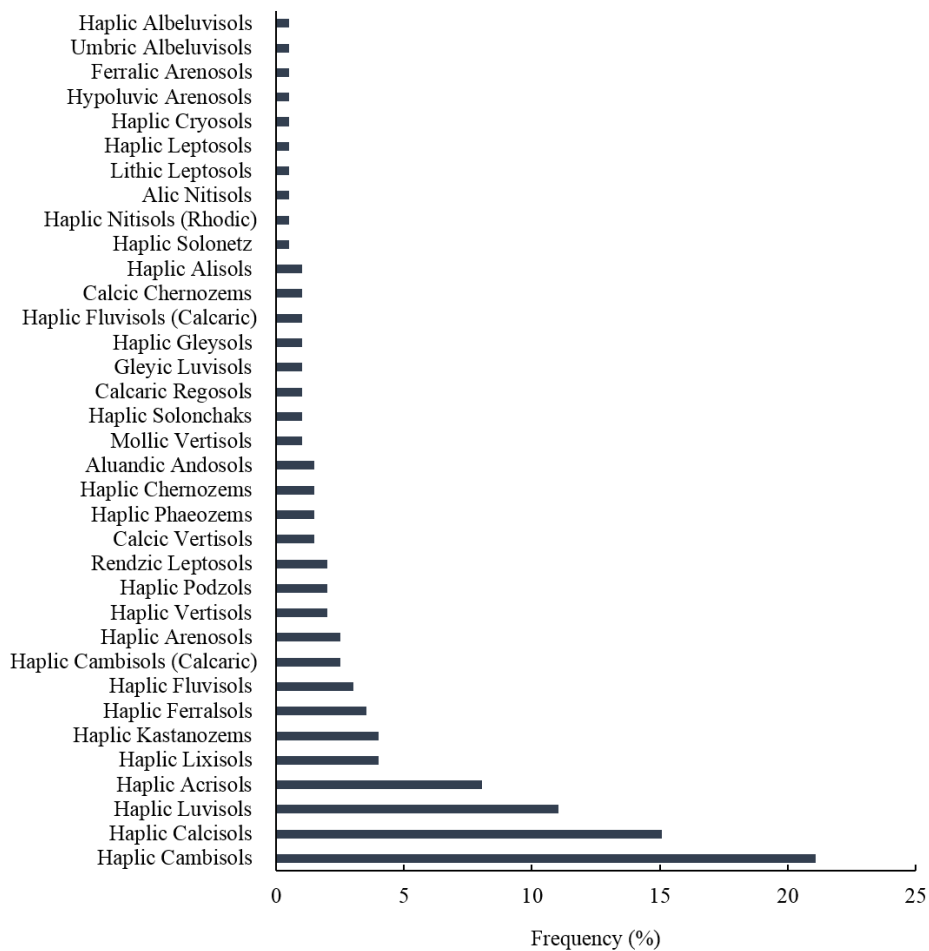

Figure 4- Frequency of WRB reference soil subgroups in experimental sites derived from SoilGrids (Hengl et al., 2017)

Formatted: Font: (Default) Times New Roman, 10 pt, Complex Script Font: Times New Roman, 10 pt

Formatted: Font: (Default) Times New Roman, 10 pt, Complex Script Font: Times New Roman, 10 pt



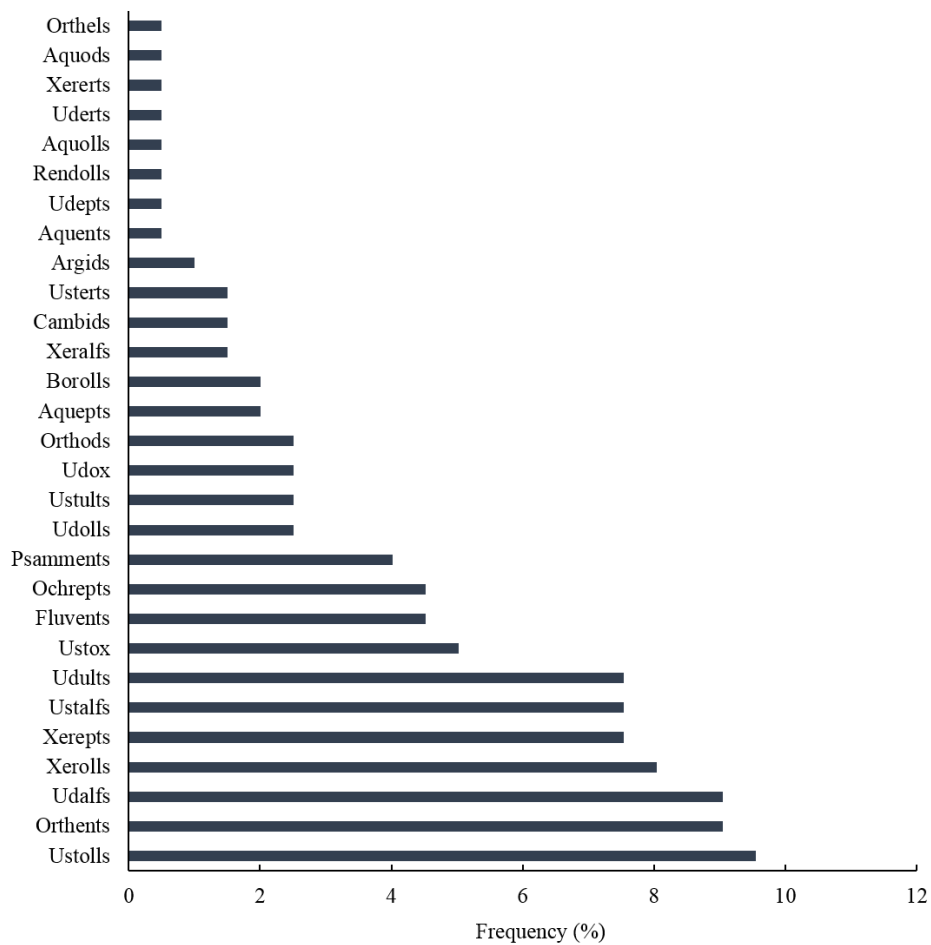

Figure 5- Frequency of USDA soil suborders in experimental sites derived from SoilGrids (Hengl et al., 2017).

Formatted: Font: (Default) Times New Roman, 10 pt, Complex Script Font: Times New Roman, 10 pt

Formatted: Font: (Default) Times New Roman, 10 pt, Complex Script Font: Times New Roman, 10 pt

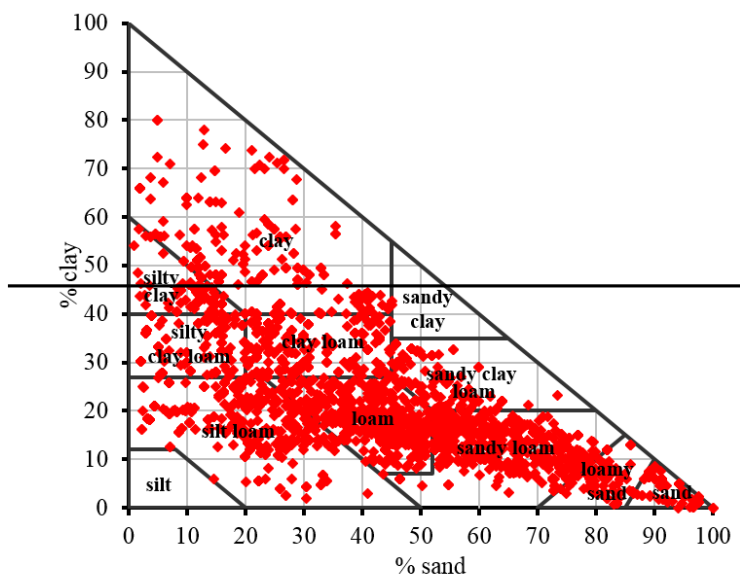

1054

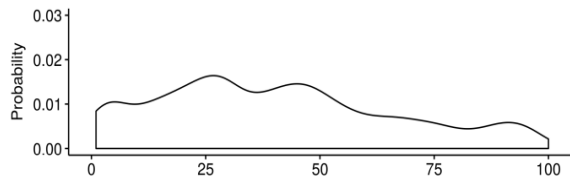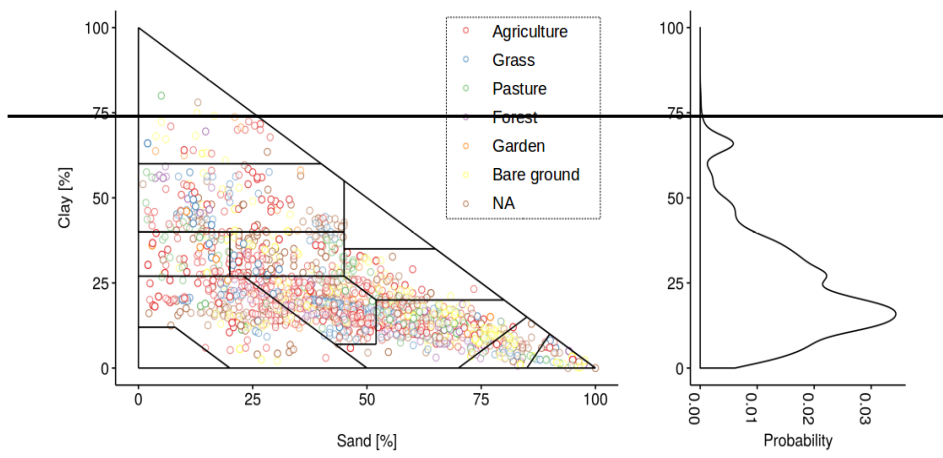

1055

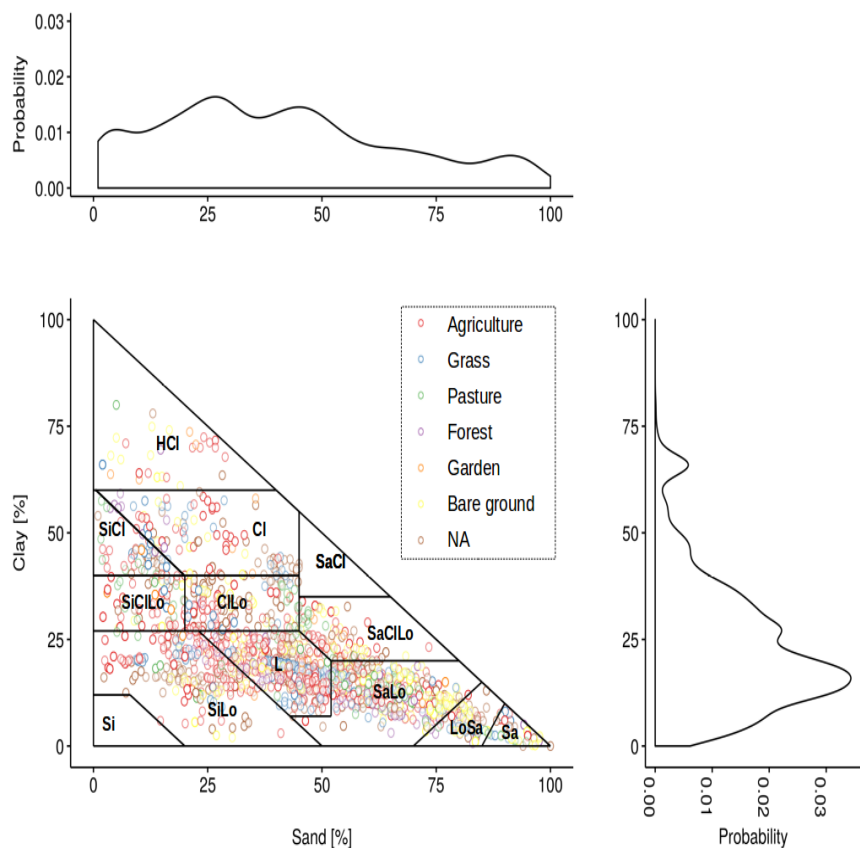

1056  
 1057 Figure 3-6 - Textural distribution of soils and probability density functions of clay (on the right) and sand (on the  
 1058 top) particles of soils (plotted on USDA textural triangle) for which infiltration data are included in the database.  
 1059 Dots are colored according to their corresponding land use.  
 1060 HCl: Highly clayey; SiCl: silty clay; Cl: clay; SiClLo: silty clay loam; ClLo: clay loam; SaCl: sandy clay; SaClLo:  
 1061 sandy clay loam; L: loam; Si: silty; SiLo: silty loam; SaLo: sandy loam; LoSa: loamy sand; and Sa: sandy  
 1062

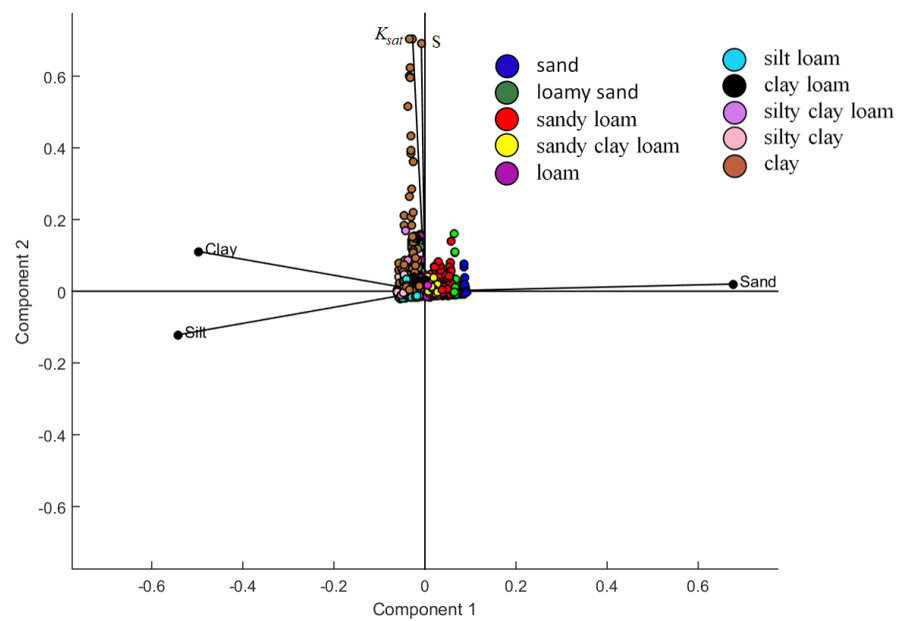

Figure 47- The relationships between clay, silt, sand contents and estimated hydraulic parameters ( $S$  and  $K_{sat}$ )

Formatted: Font: Italic, Complex Script Font: Italic

Formatted: Font: Italic, Complex Script Font: Italic

Formatted: Font: Italic, Complex Script Font: Italic, Subscript

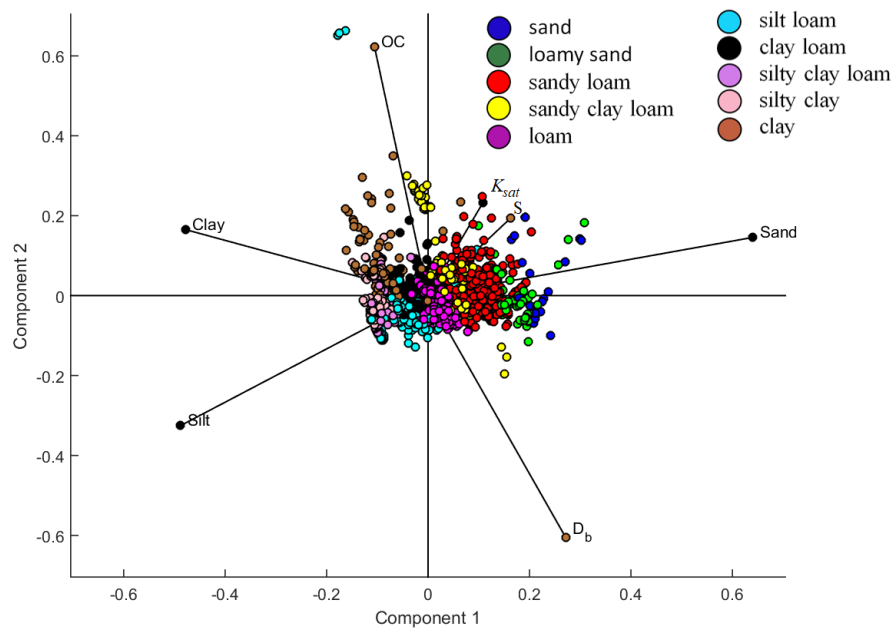

Figure 58- The relationships between clay, silt, sand contents,  $D_b$ , and  $OC$  and estimated hydraulic parameters ( $S$  and  $K_{sat}$ )

Formatted: Font: Italic, Complex Script Font: Italic

Formatted: Font: Italic, Complex Script Font: Italic, Subscript

Formatted: Font: Italic, Complex Script Font: Italic

Formatted: Font: Italic, Complex Script Font: Italic

Formatted: Font: Italic, Complex Script Font: Italic
